# Supplementary material
Source: PubMed Central journal article supplement (PMC6433120)
Supplement: NIHMS1006240-supplement-Supplementary_Info_Figure_1.pdf [file NIHMS1006240-supplement-Supplementary_Info_Figure_1.pdf]

Figure 1b

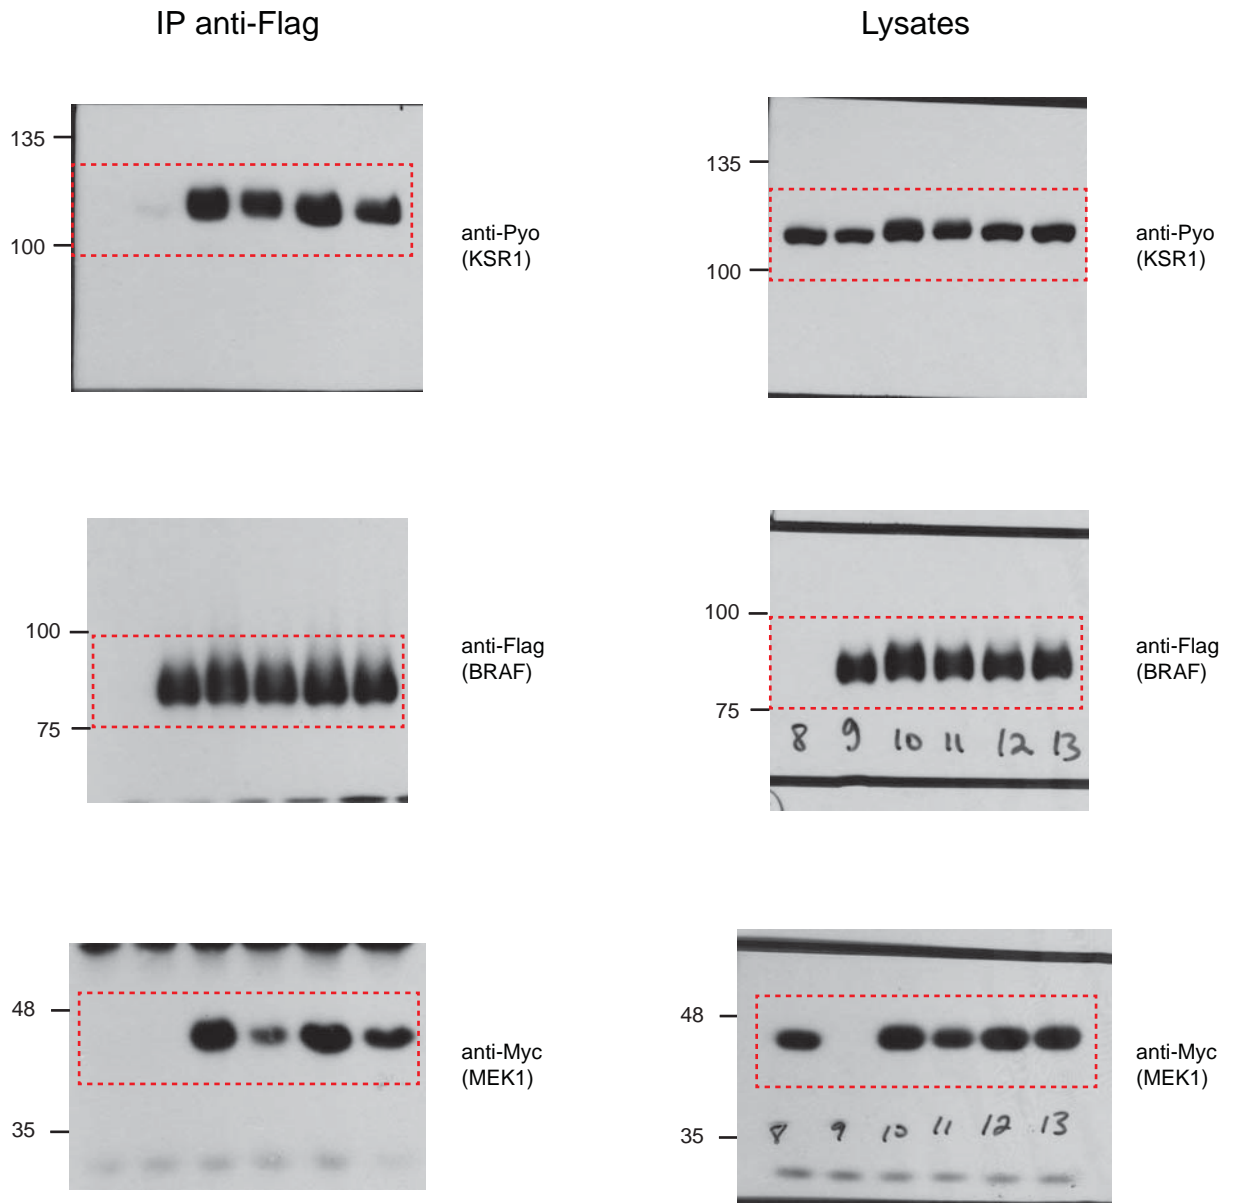

Figure 1e

IP anti-Flag

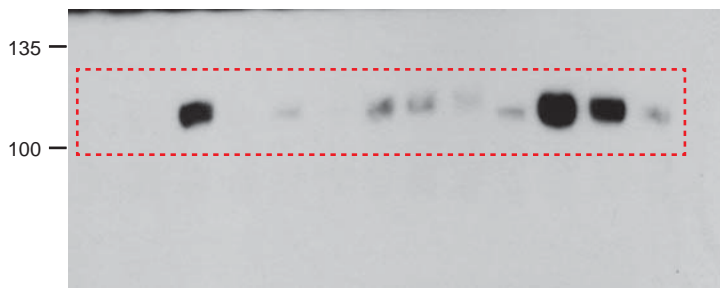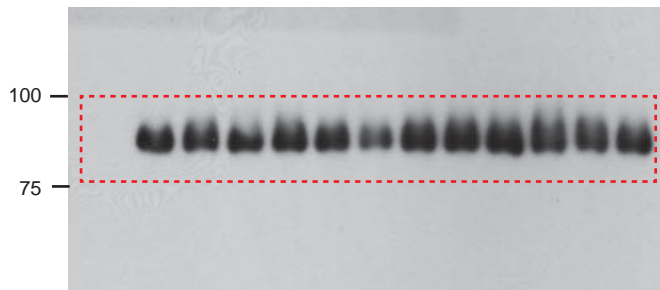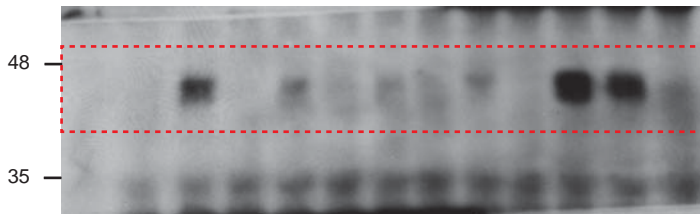

Lysates

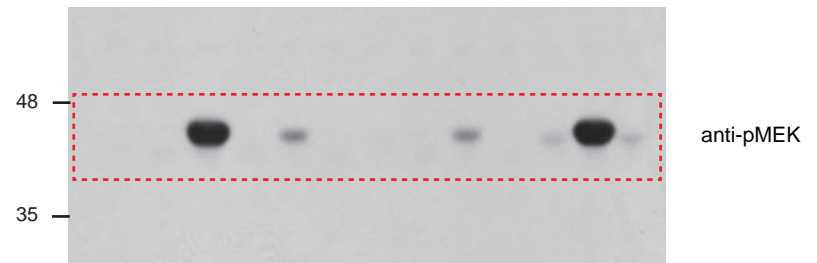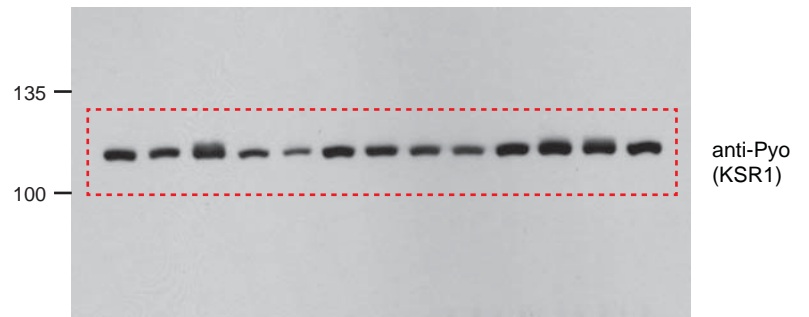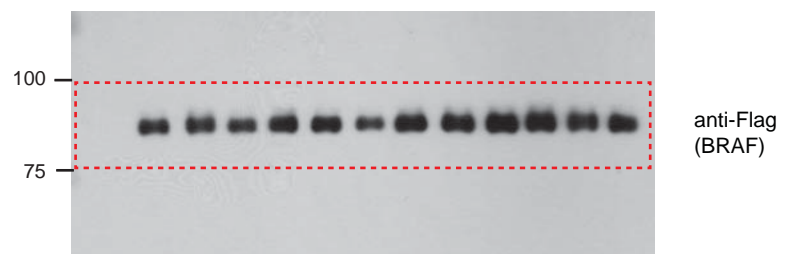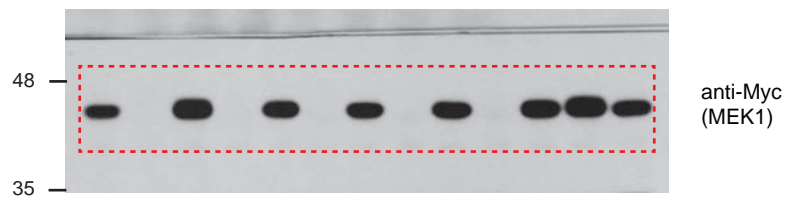

Figure 2c

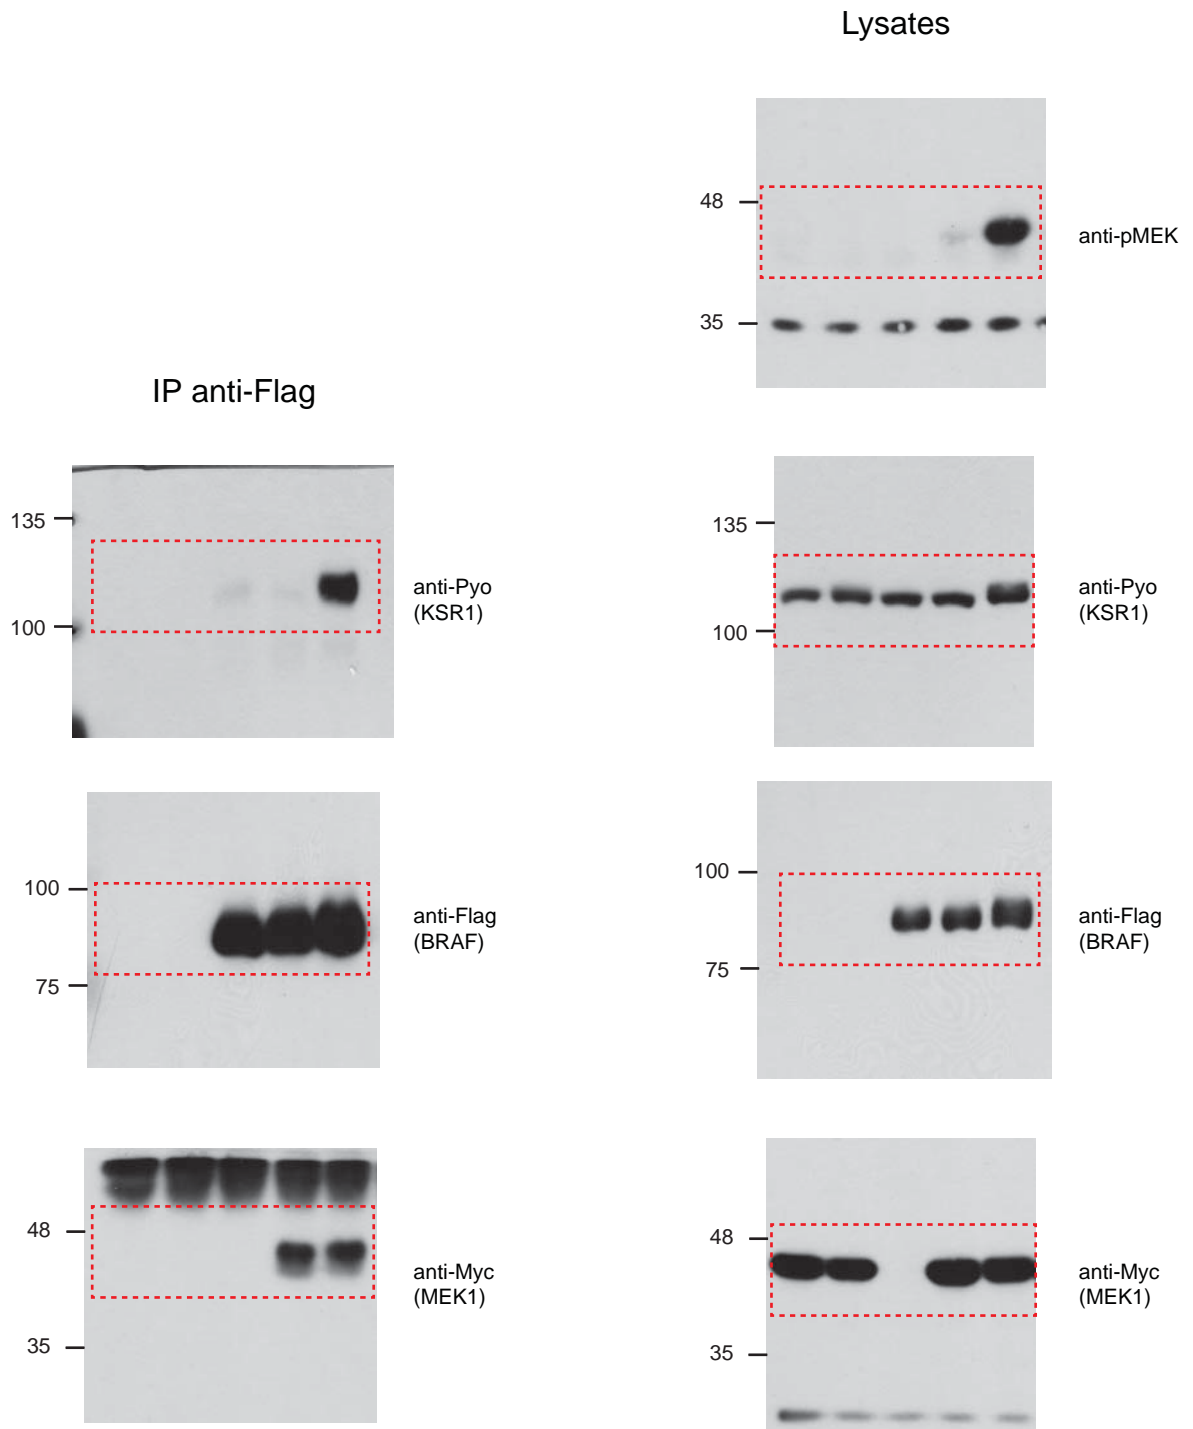

Figure 2d

Lysates

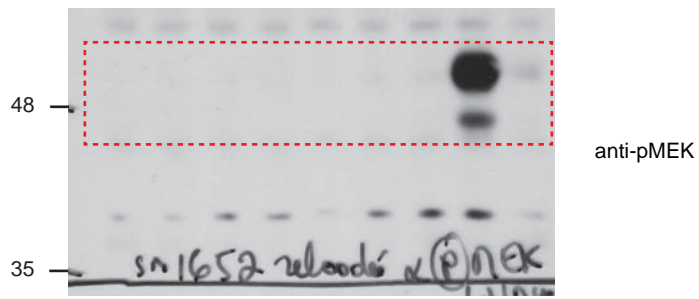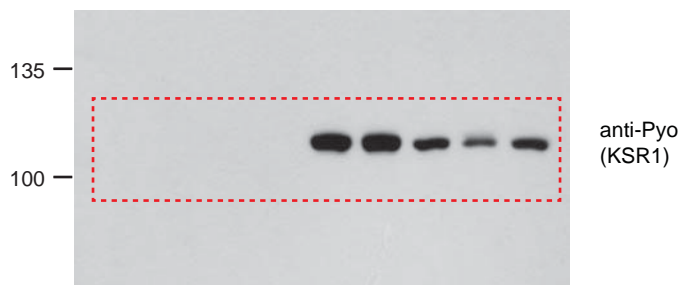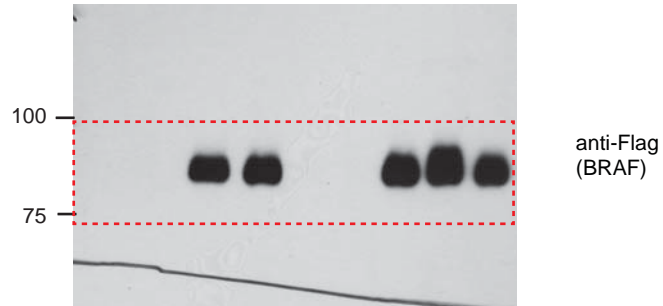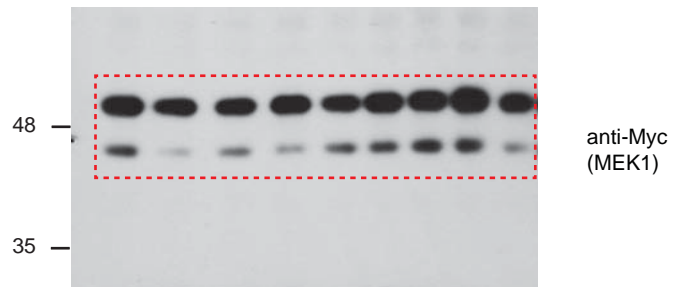

Figure 3a

Lysates

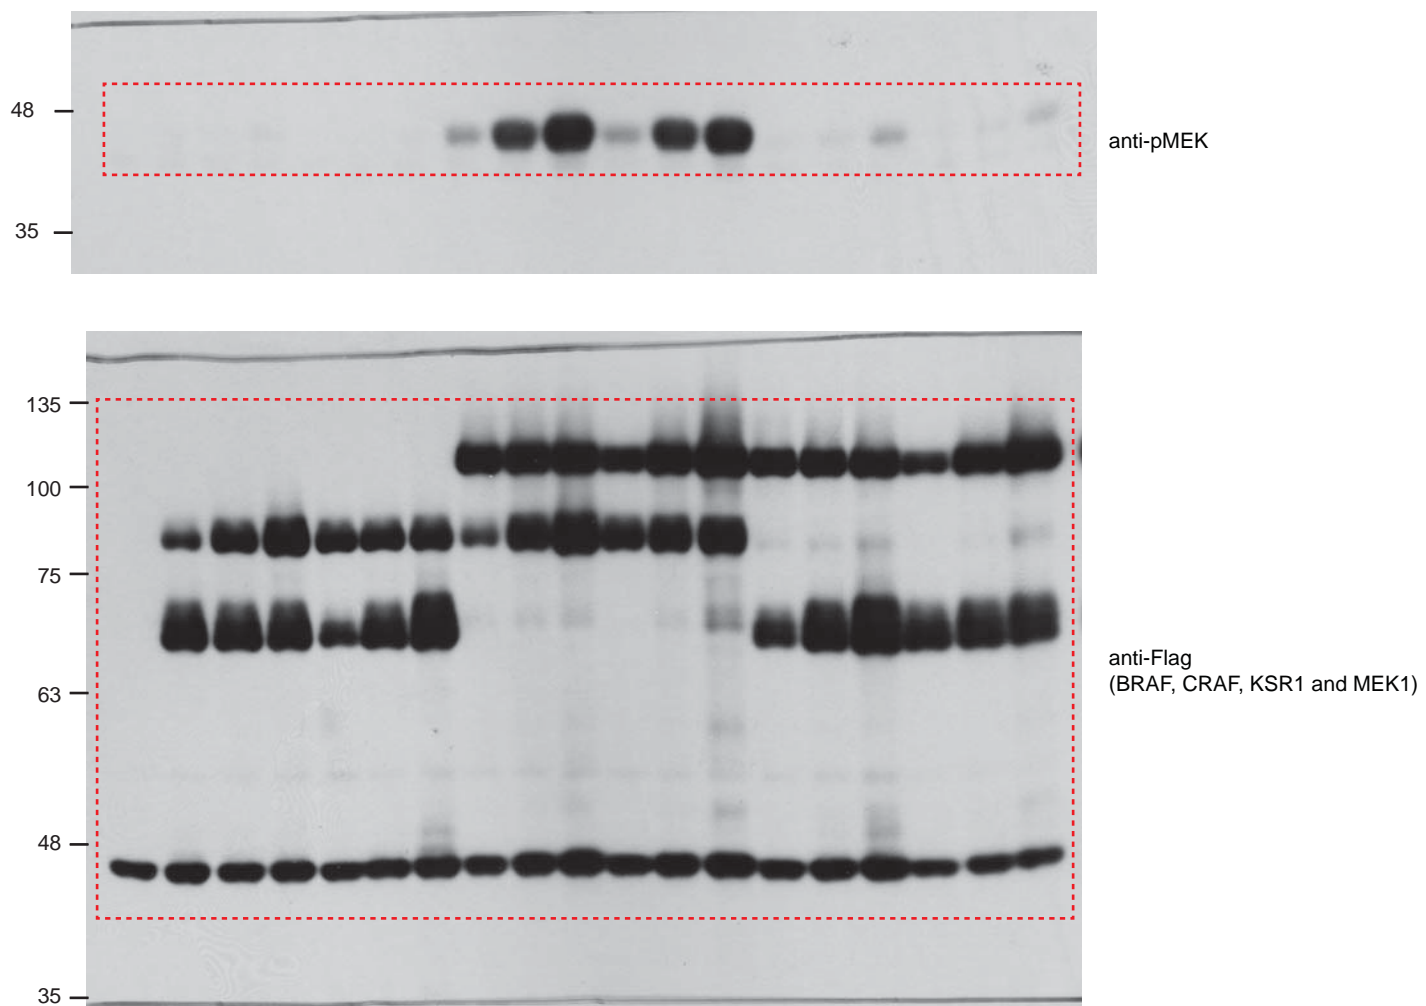

Figure 3b

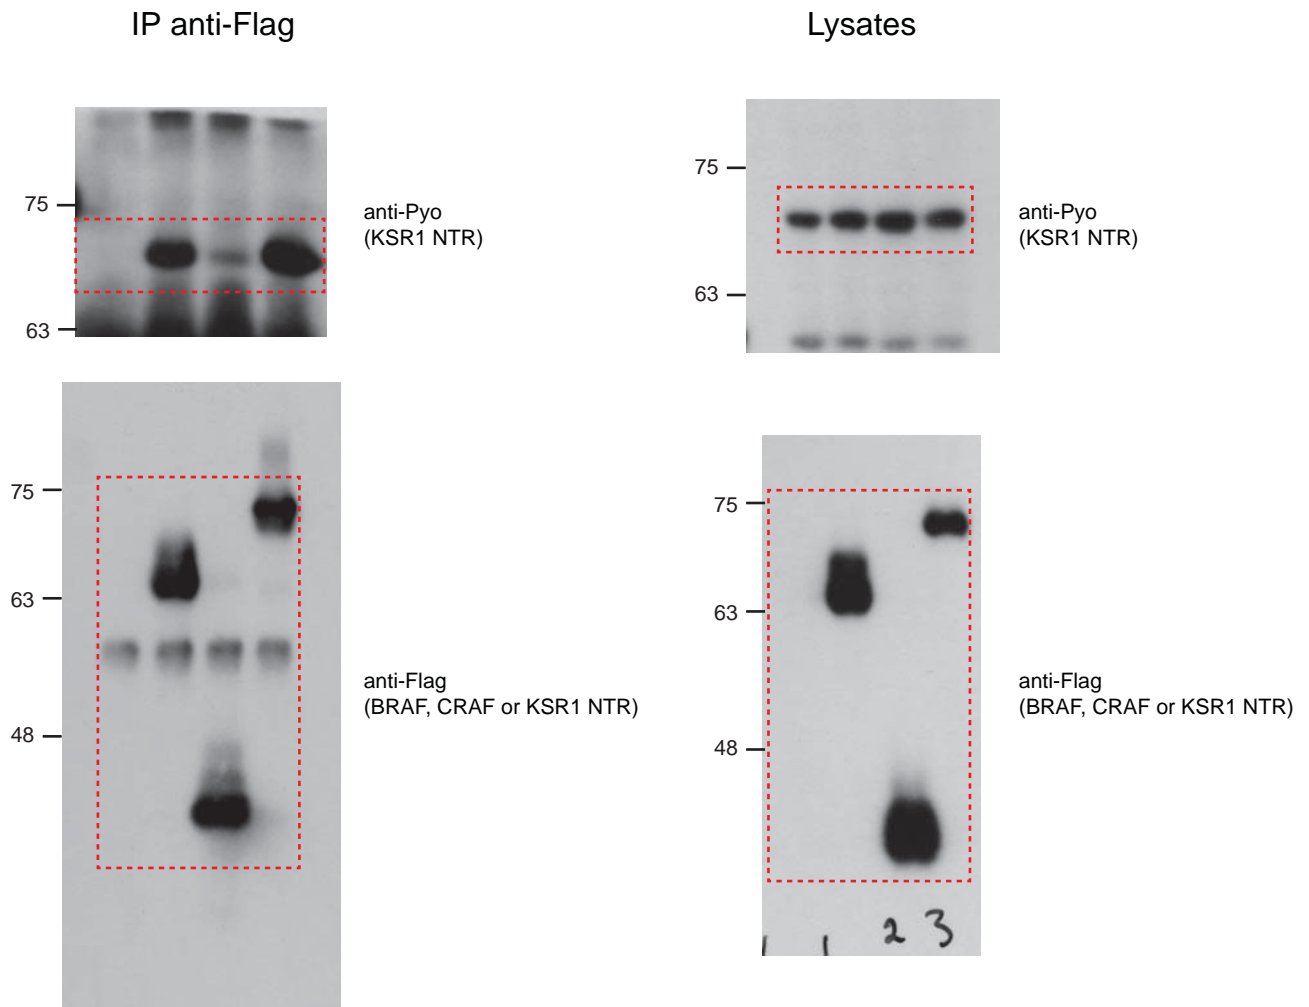

Figure 3c

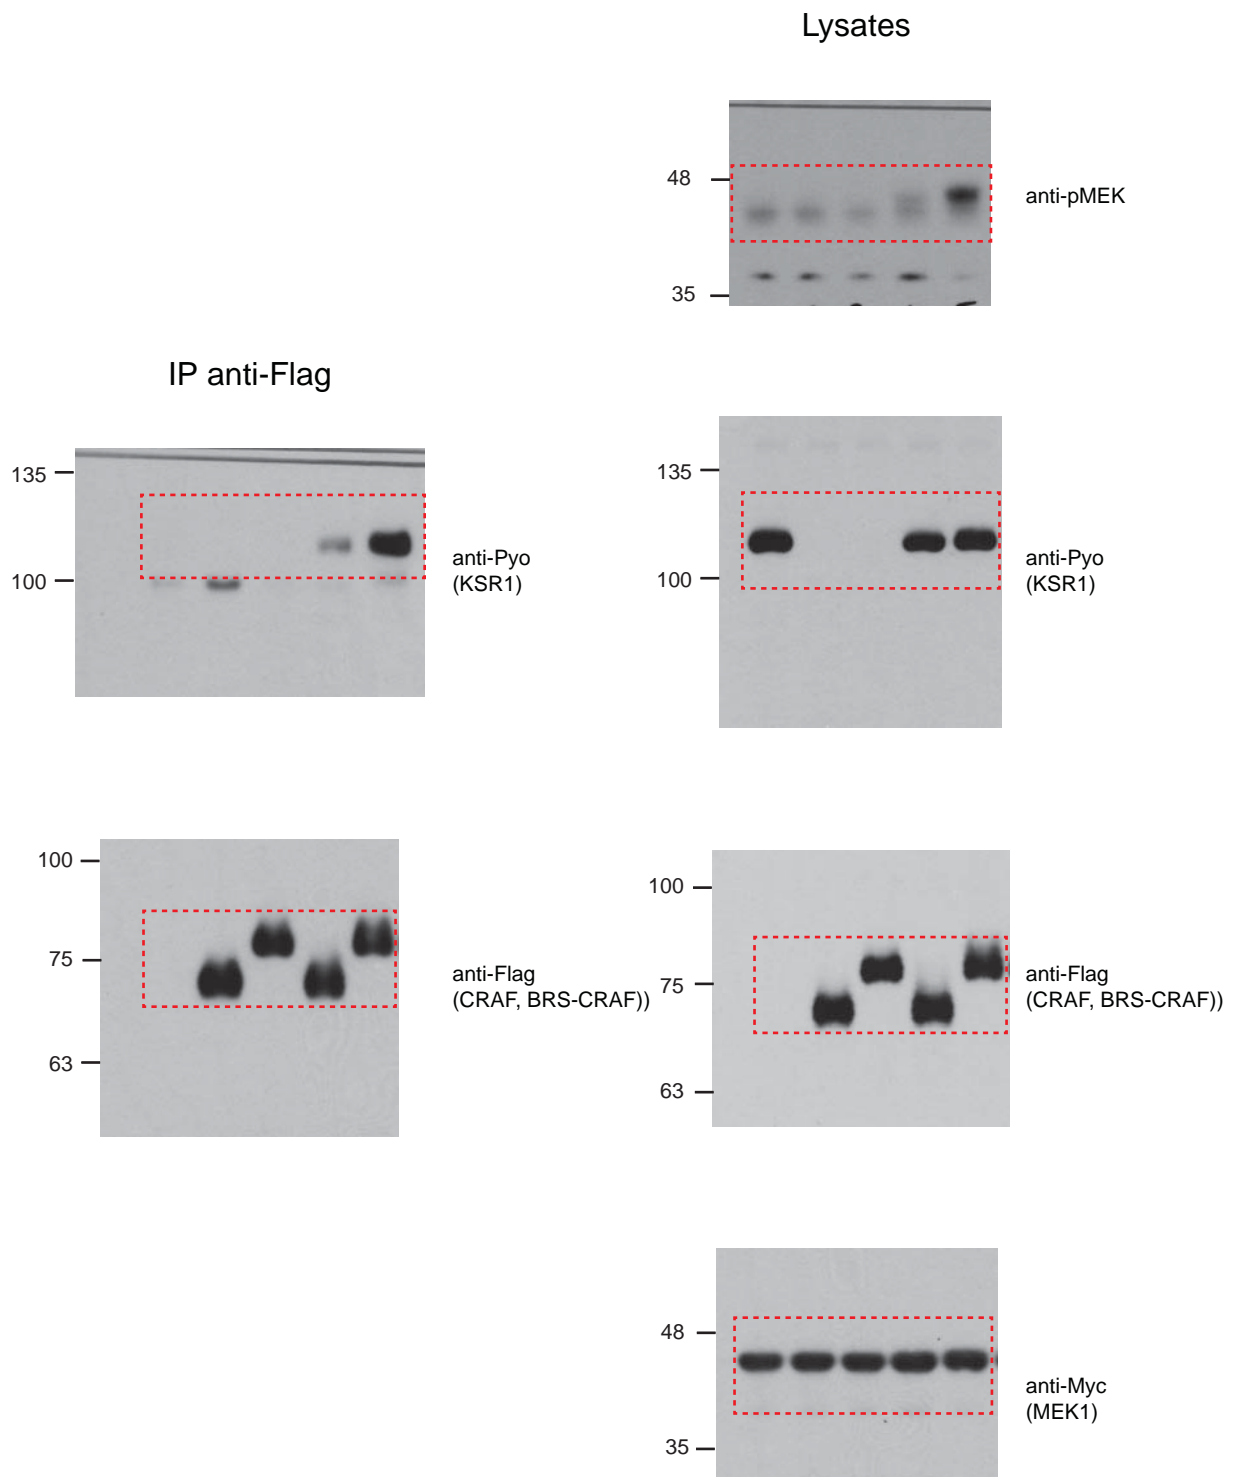

Figure 3e

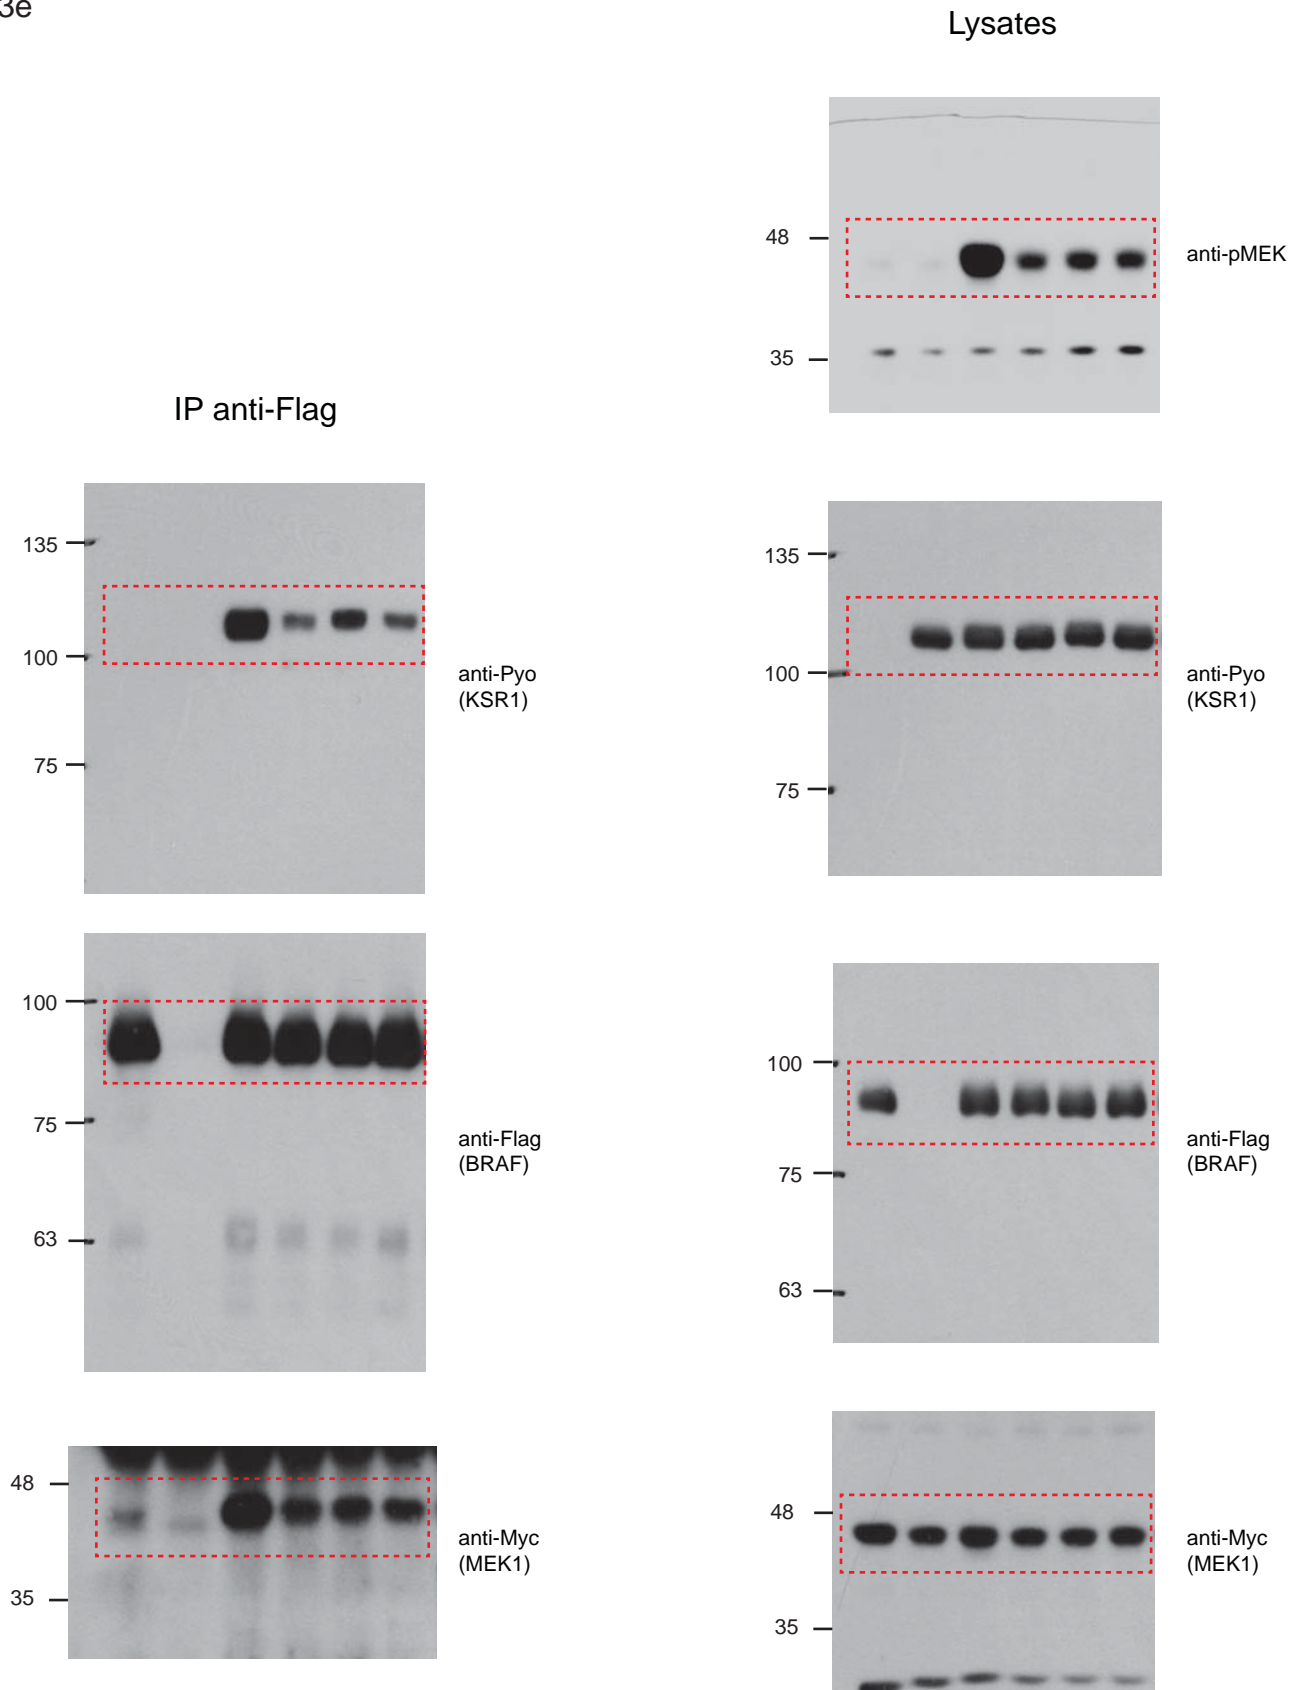



Figure 3f

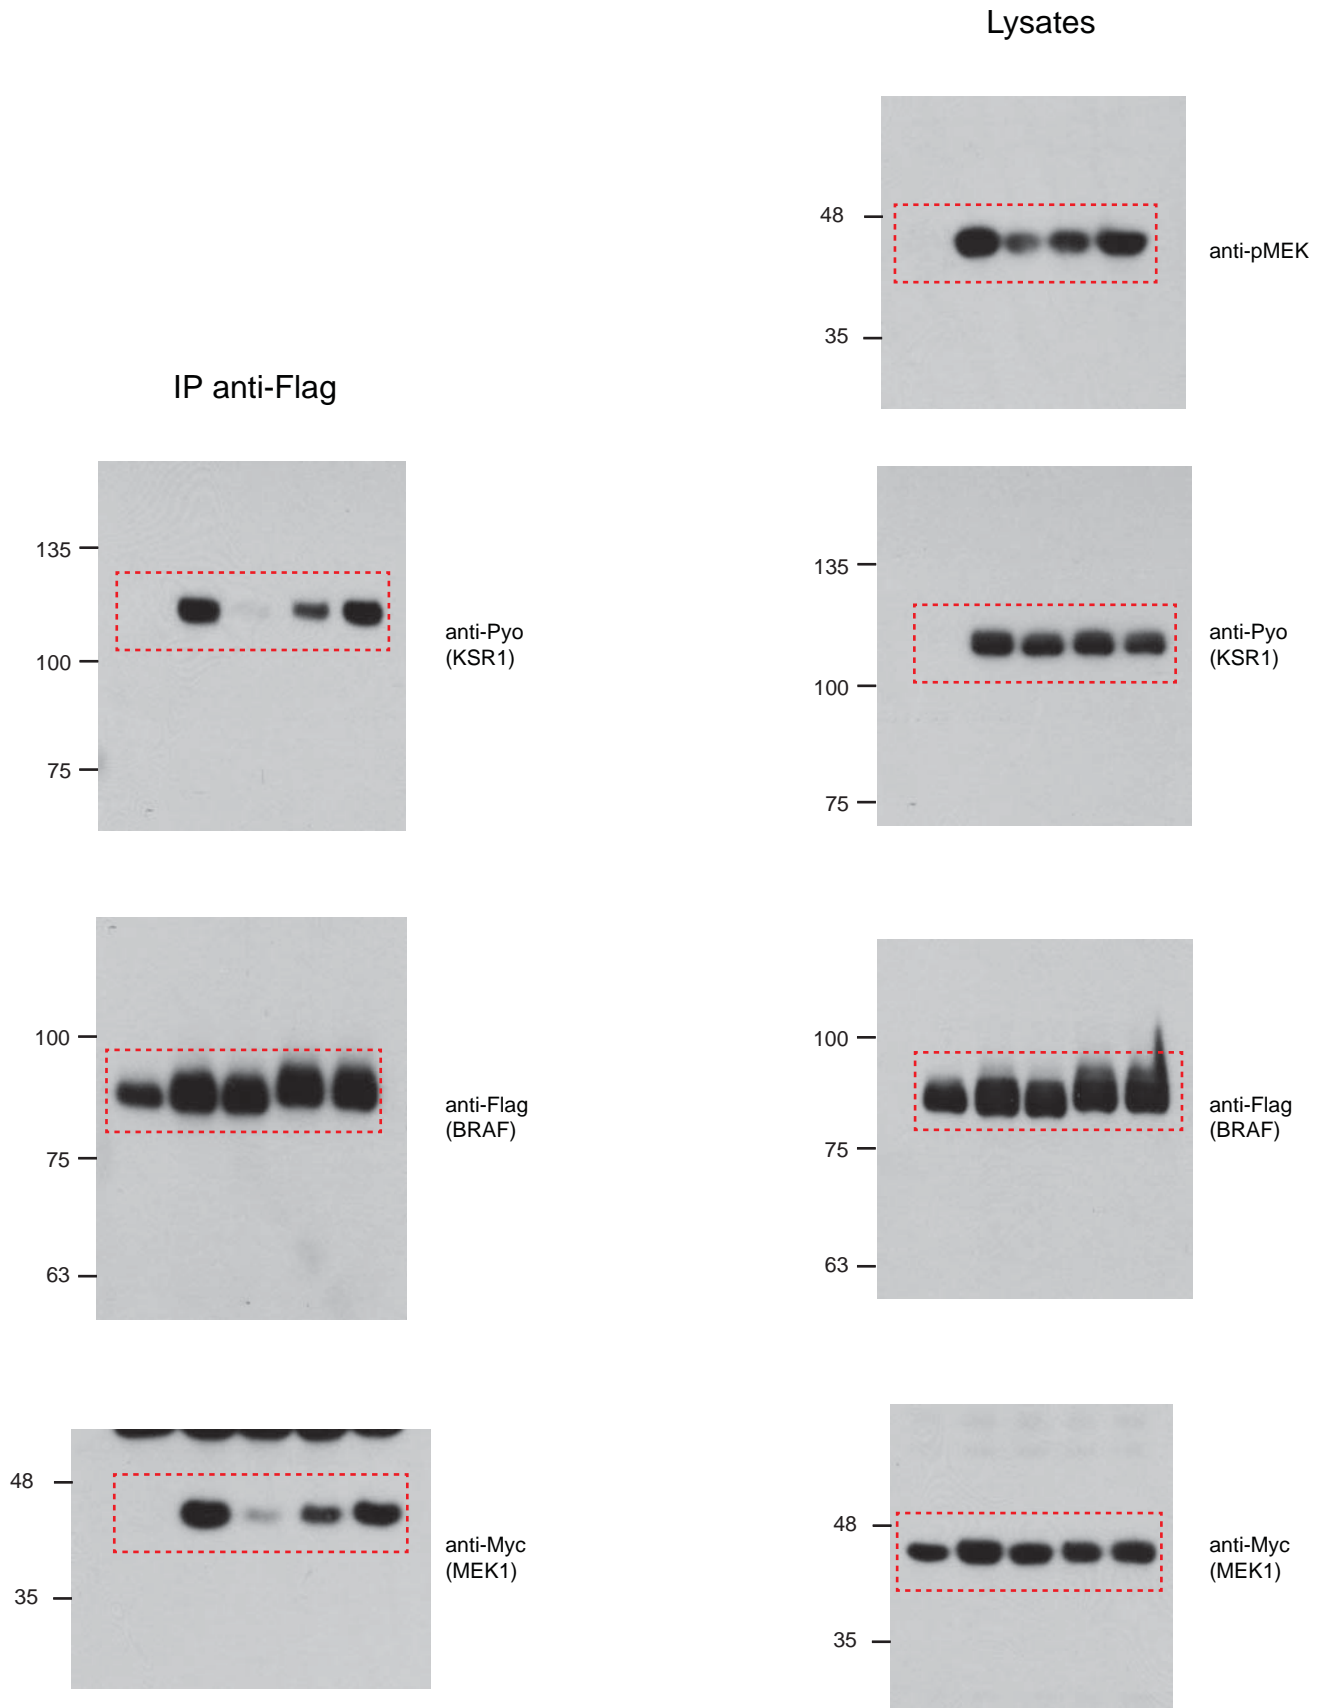

Figure 4a

IP anti-Pyo

Lysates

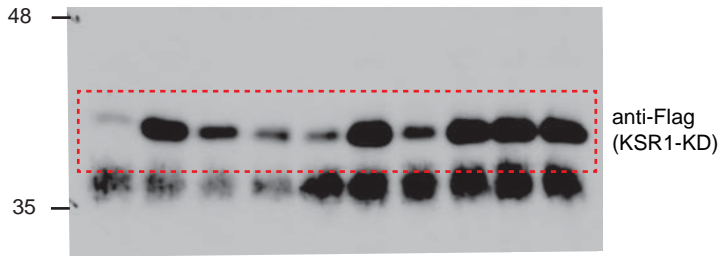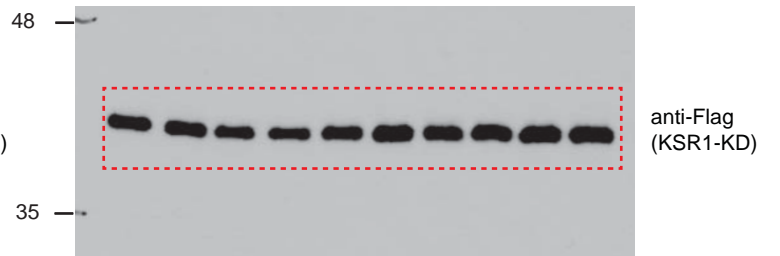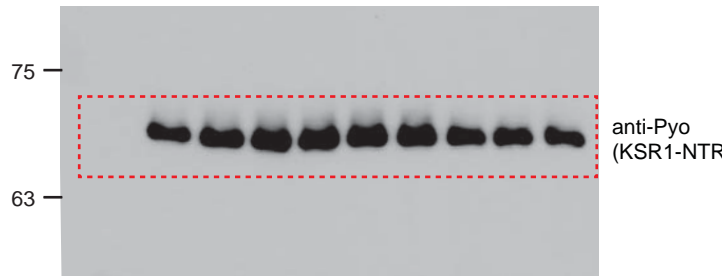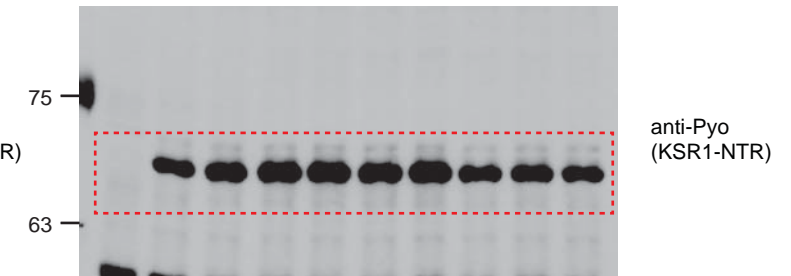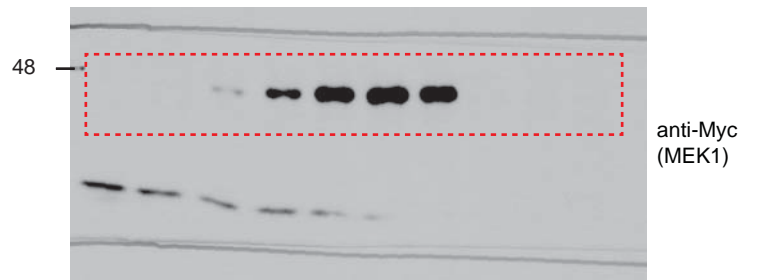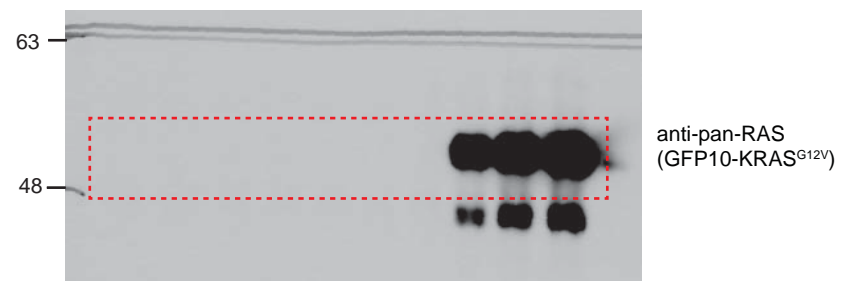

Figure 4b

IP anti-Pyo

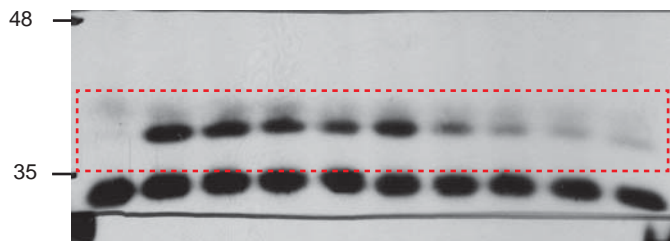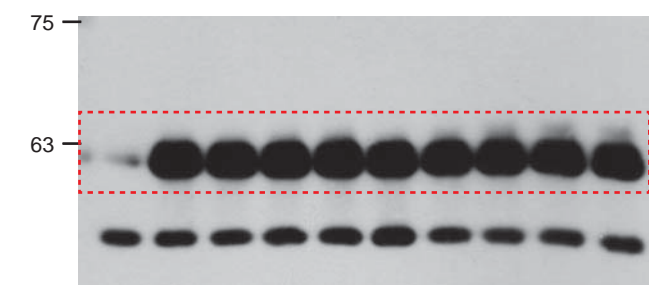

Lysates

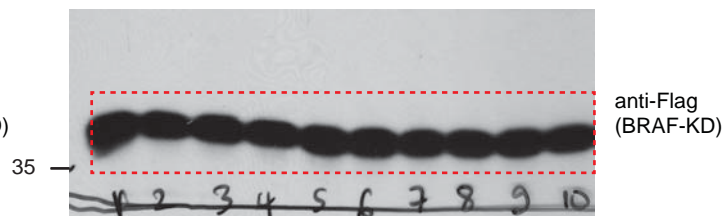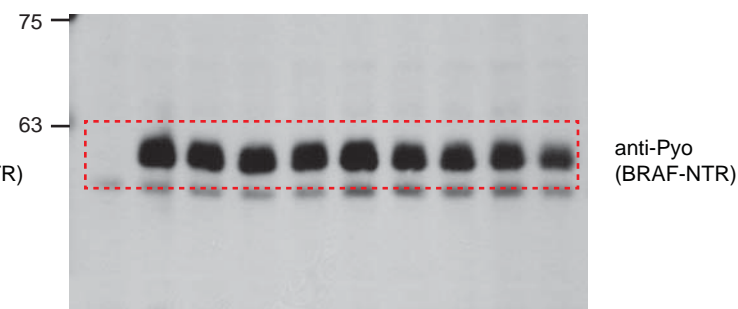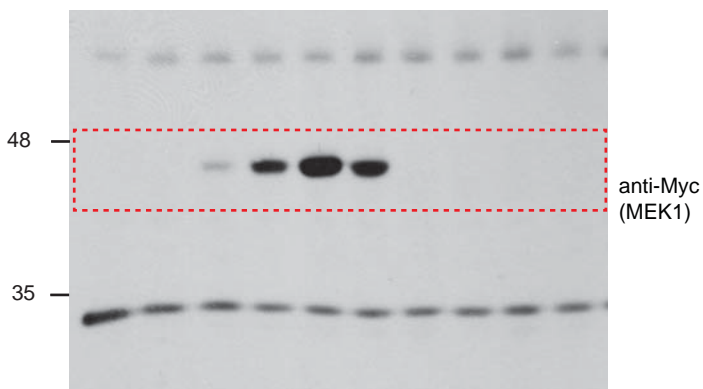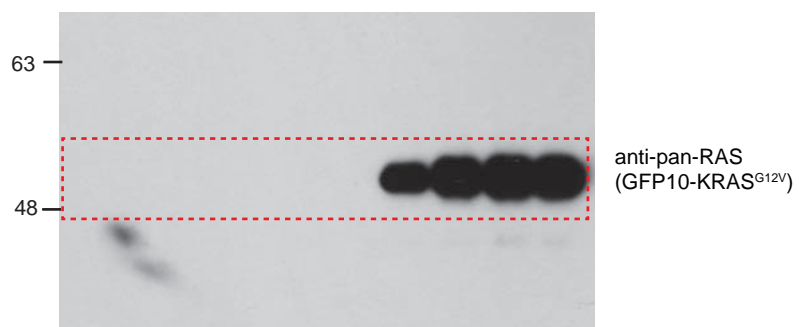

Extended Data Figure 1d

IP anti-Flag

Lysates

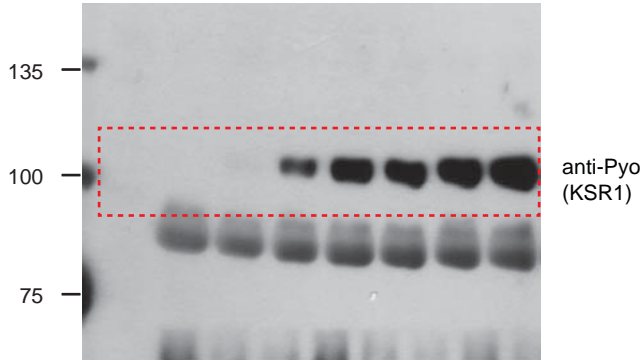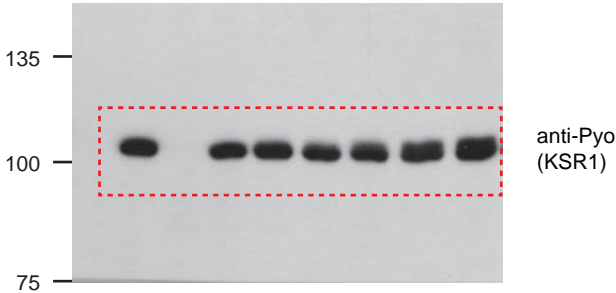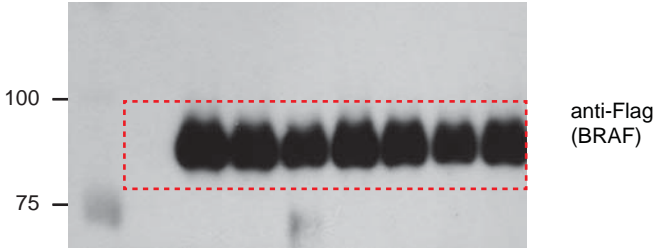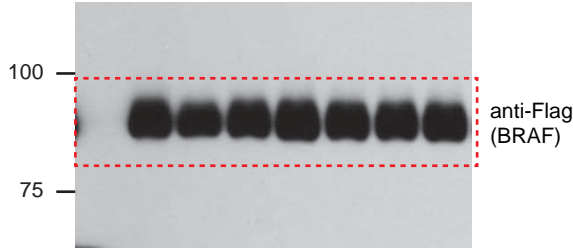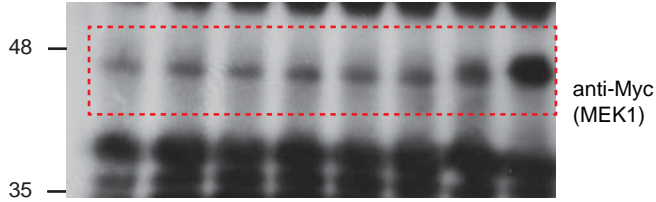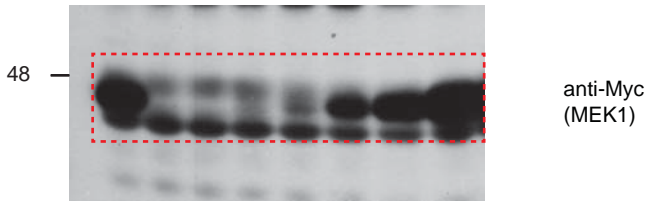

Extended Data Figure 1f

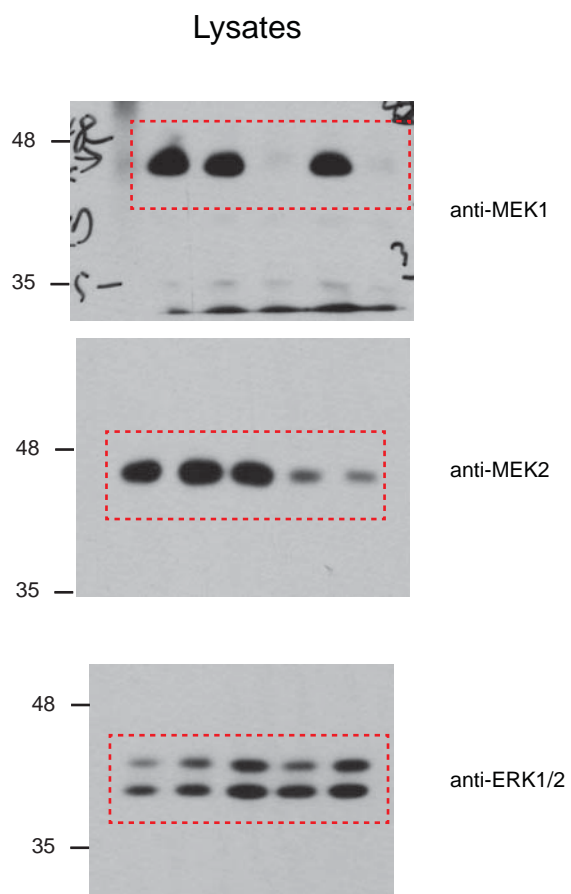

Extended Data Figure 3c

Streptavidin pull-down

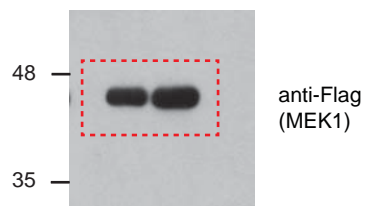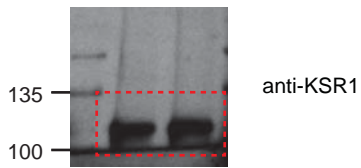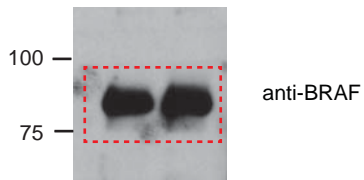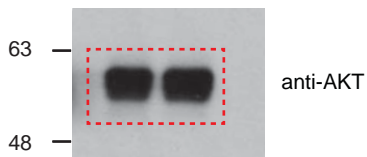

Lysates

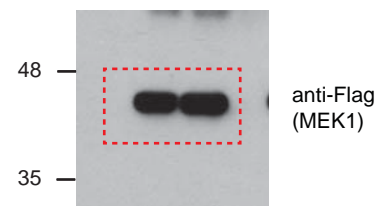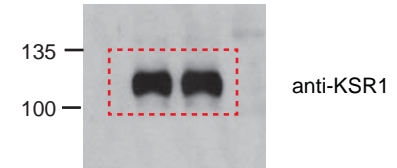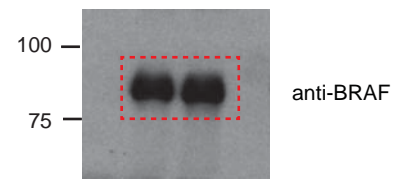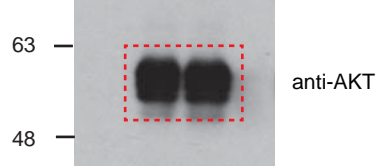

Extended Data Figure 3e

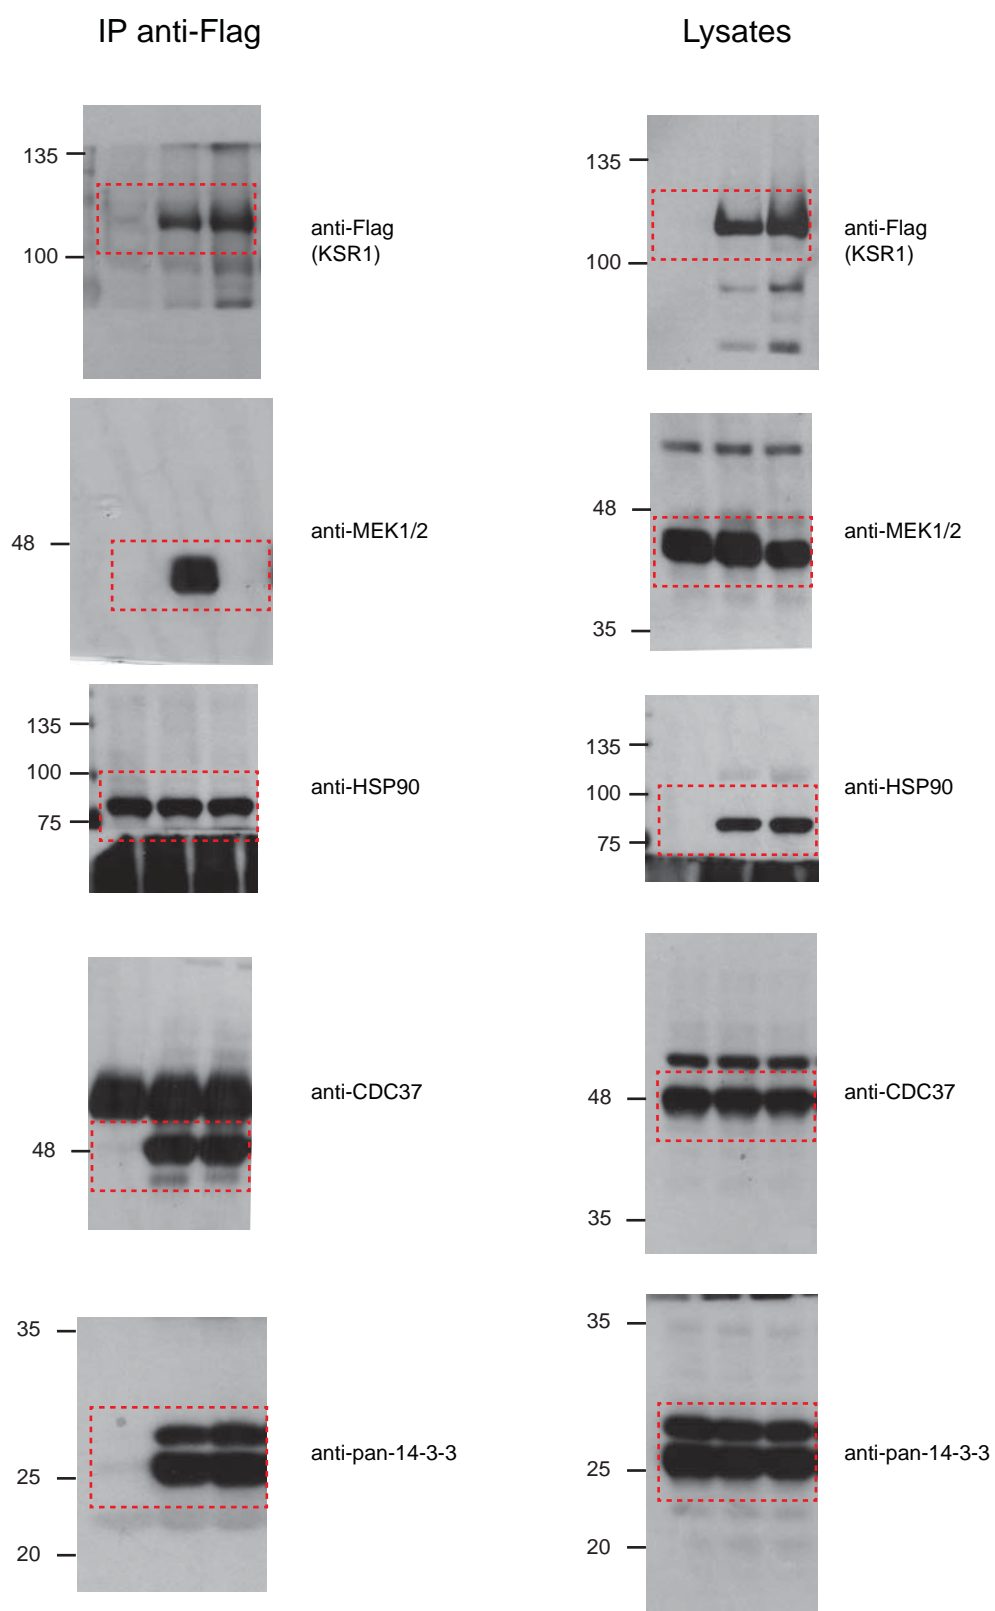

Extended Data Figure 3f

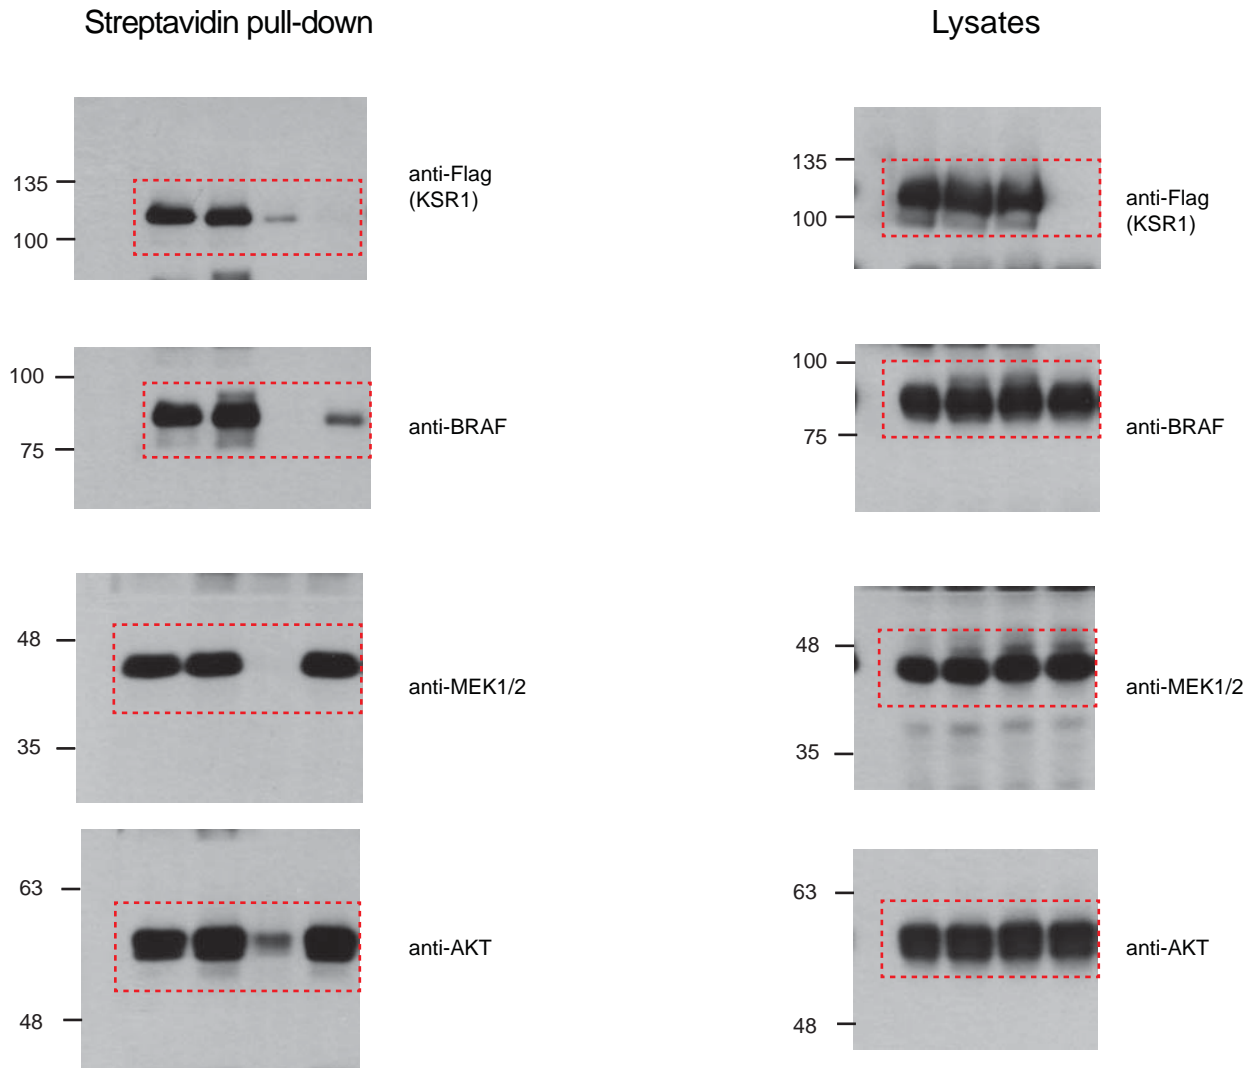



Extended Data Figure 3g

Lysates

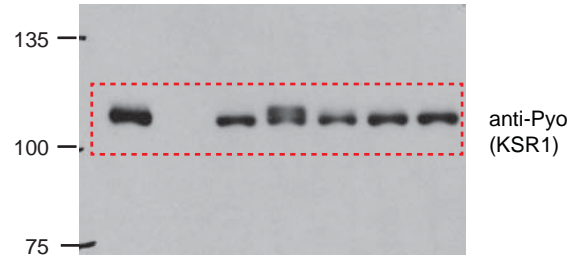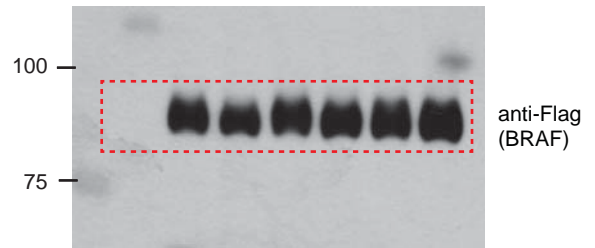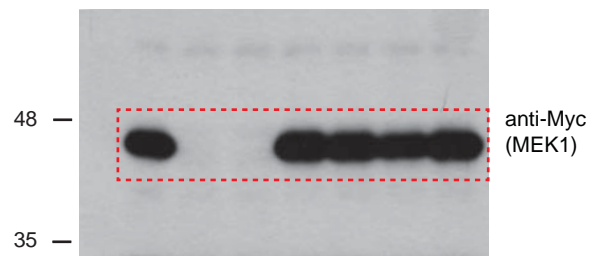

anti-Flag agarose purification

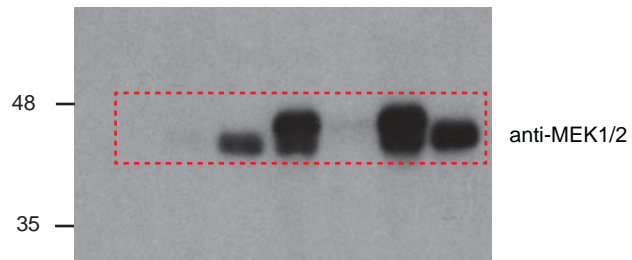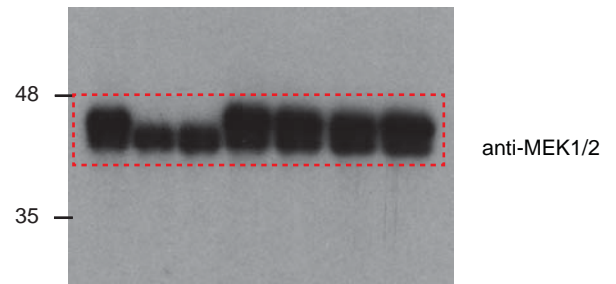

Extended Data Figure 3h

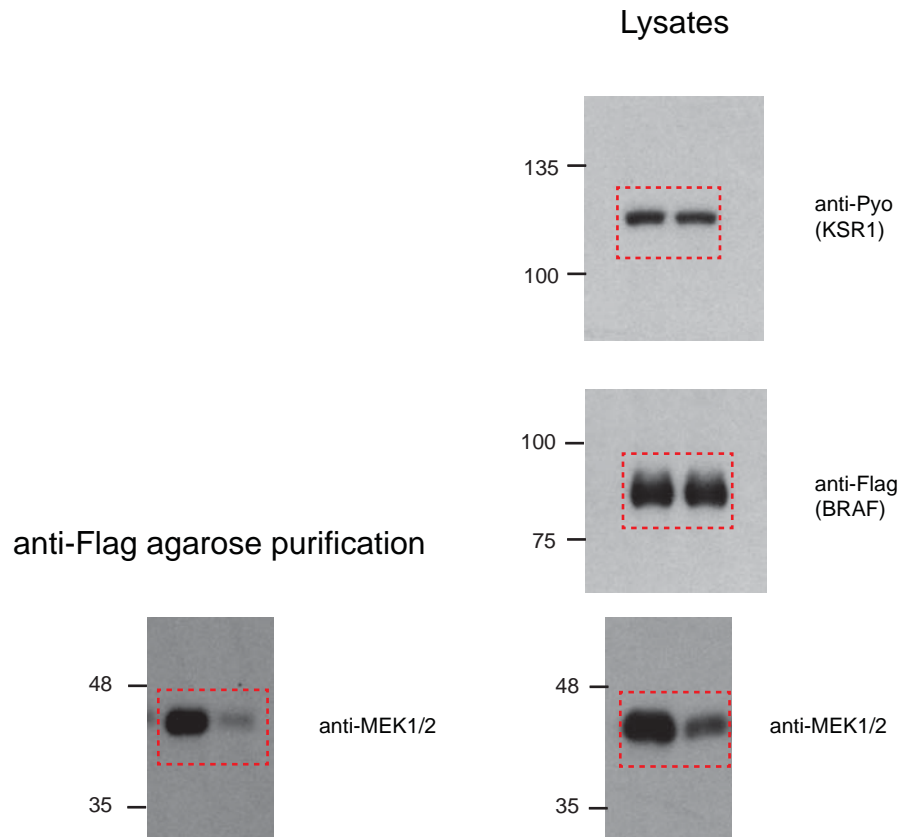

Extended Data Figure 4a

Lysates

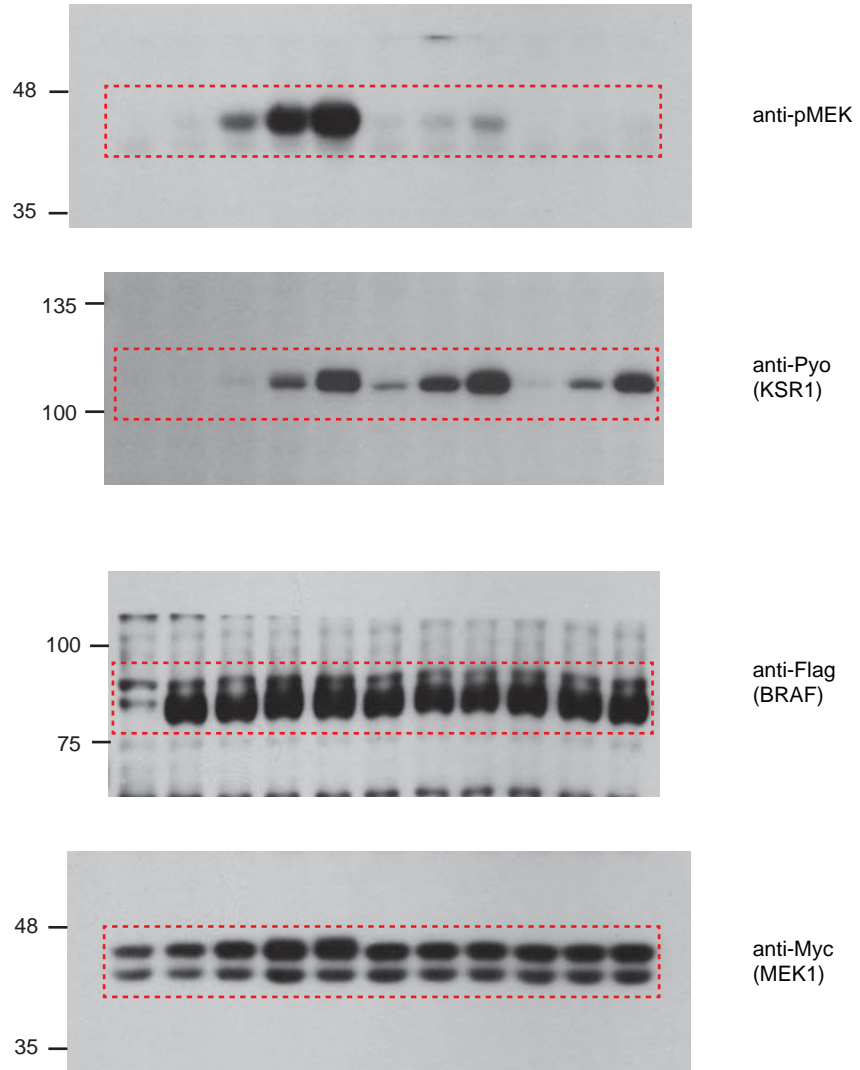

Extended Data Figure 4b

Lysates

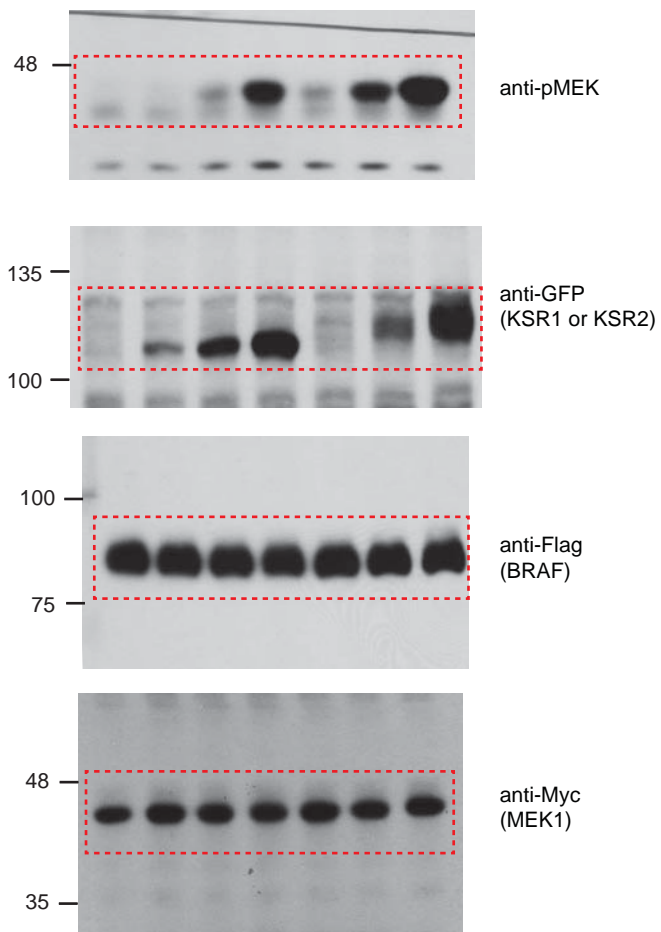

Extended Data Figure 4c

Lysates

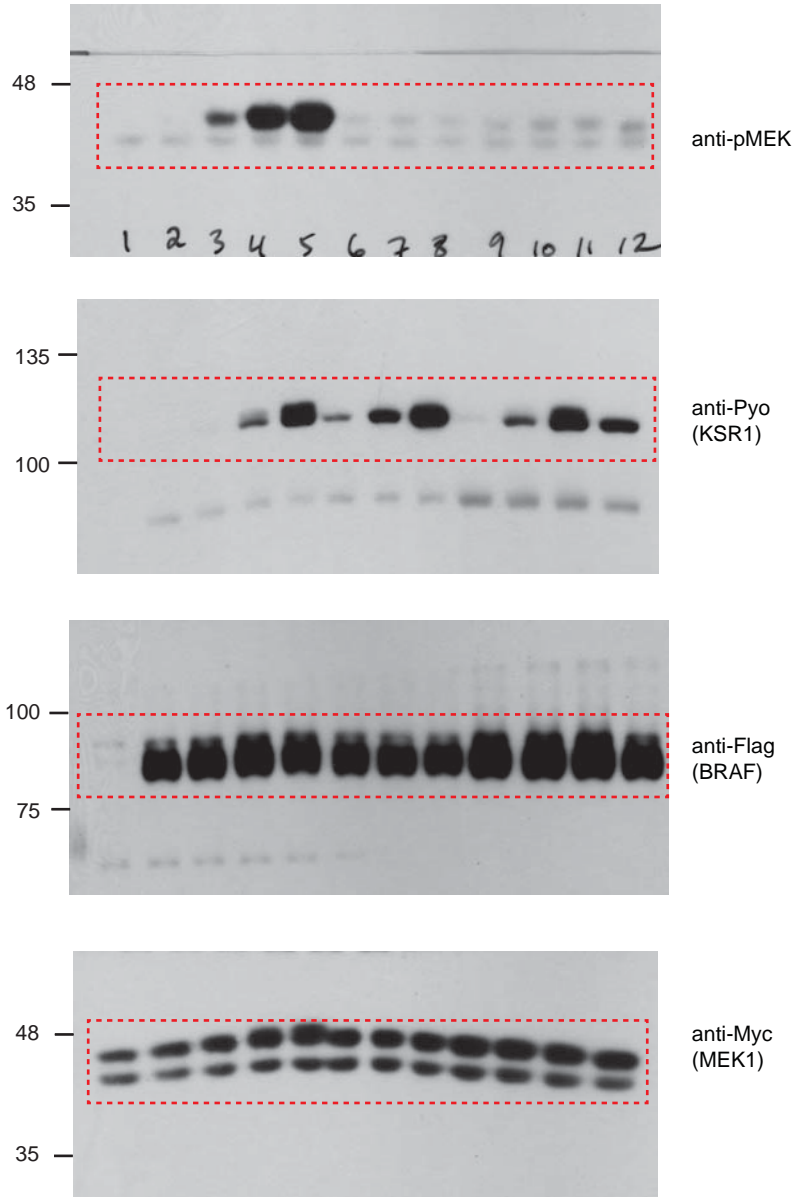

Extended Data Figure 4d

Lysates

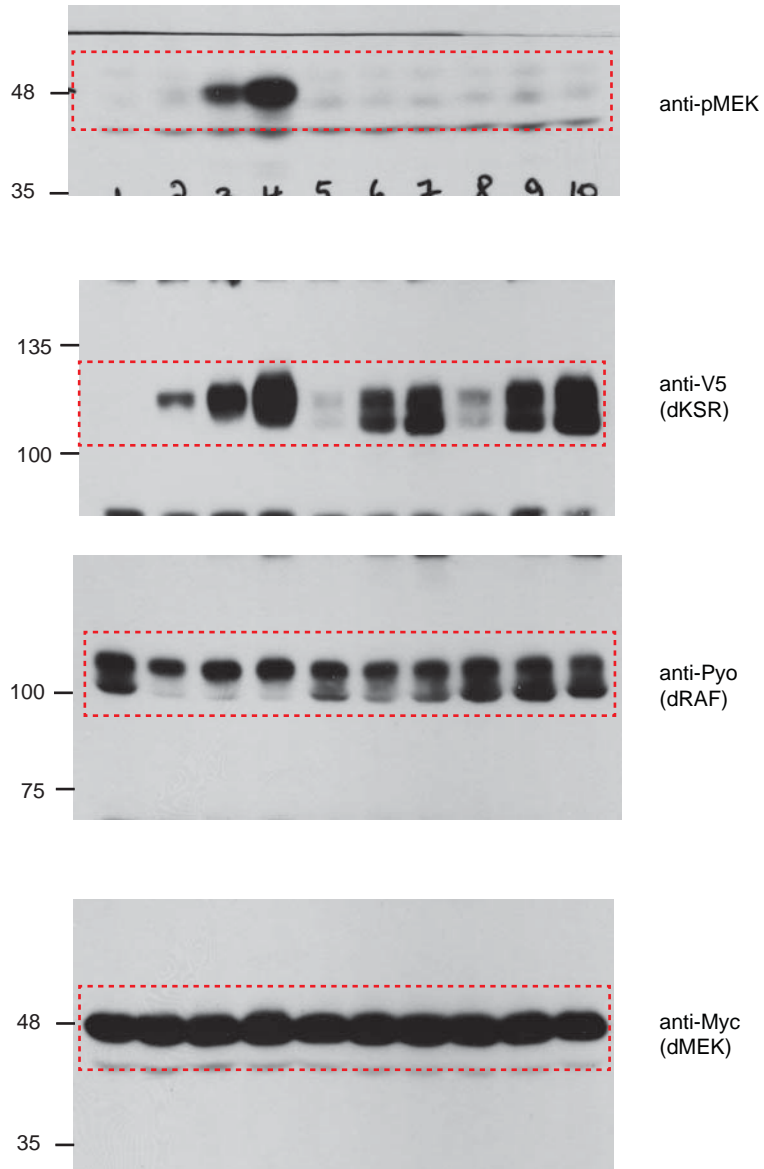

Extended Data Figure 4e

Lysates

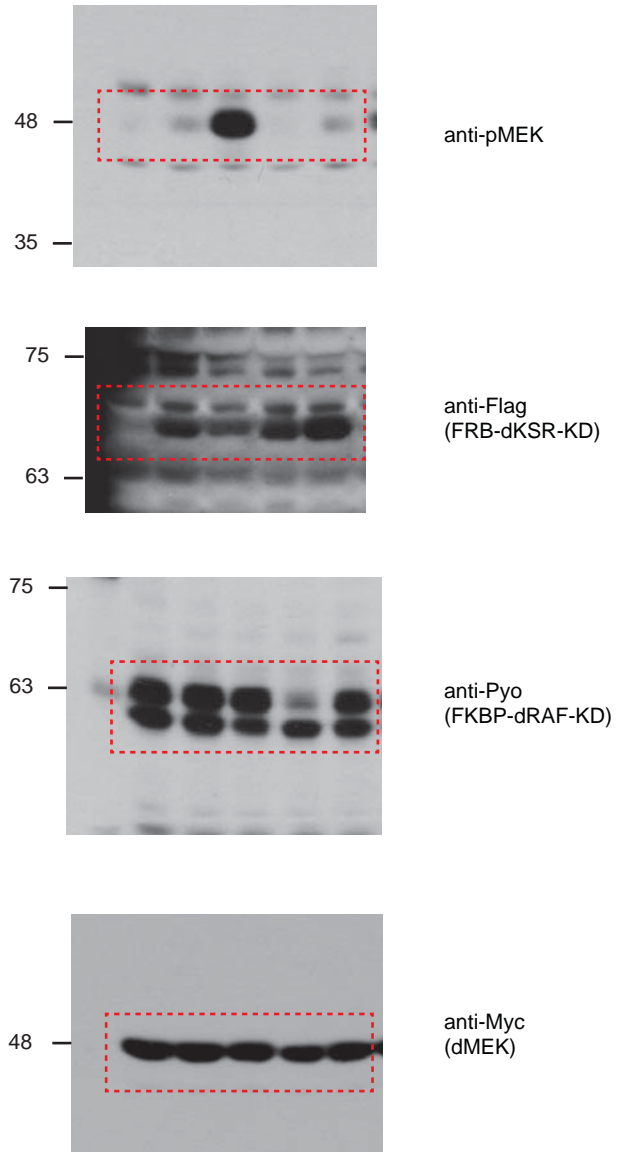

Extended Data Figure 4f

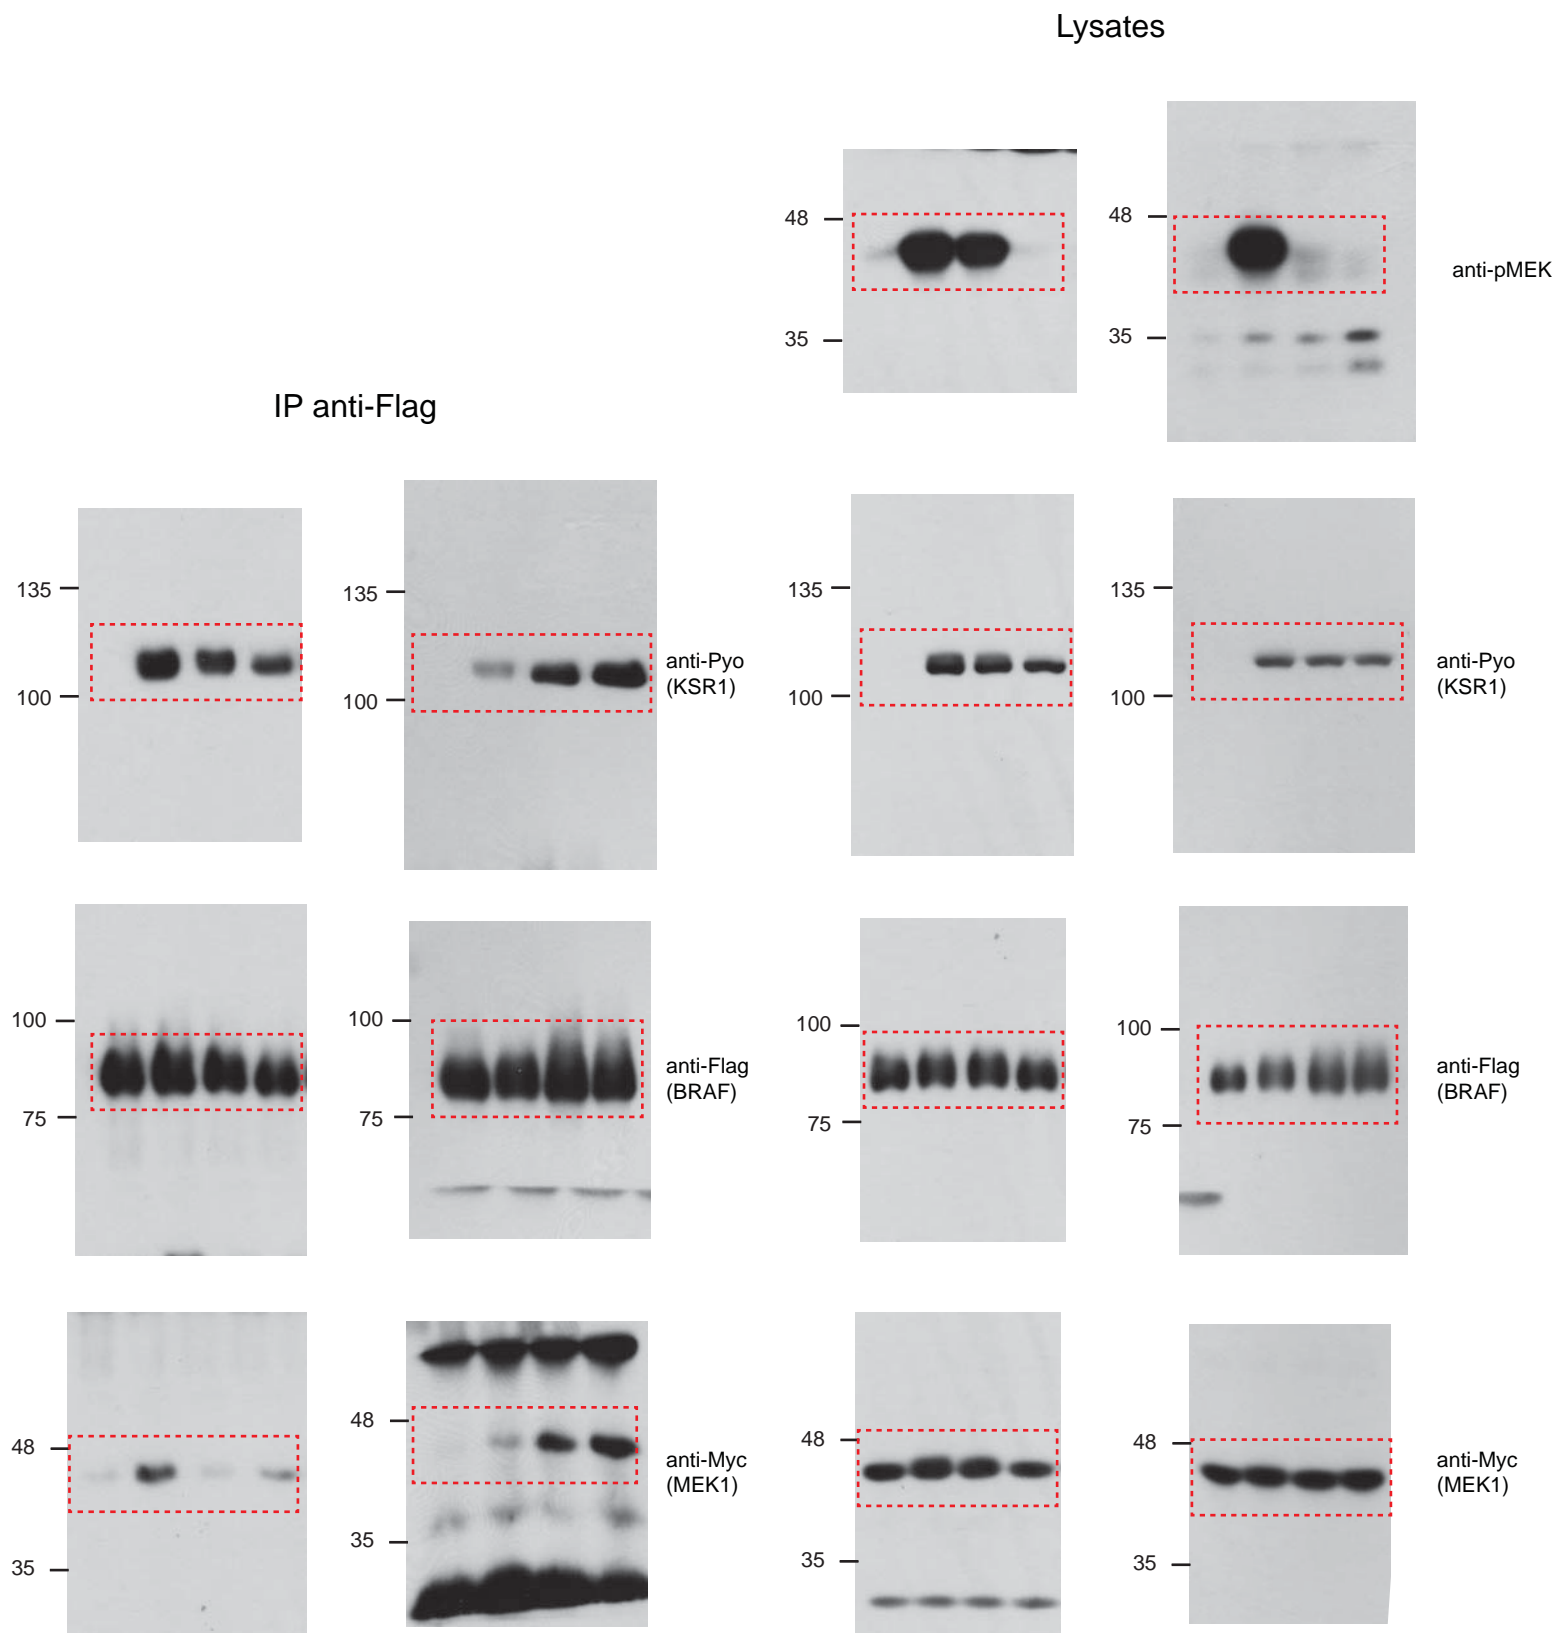



Extended Data Figure 4g

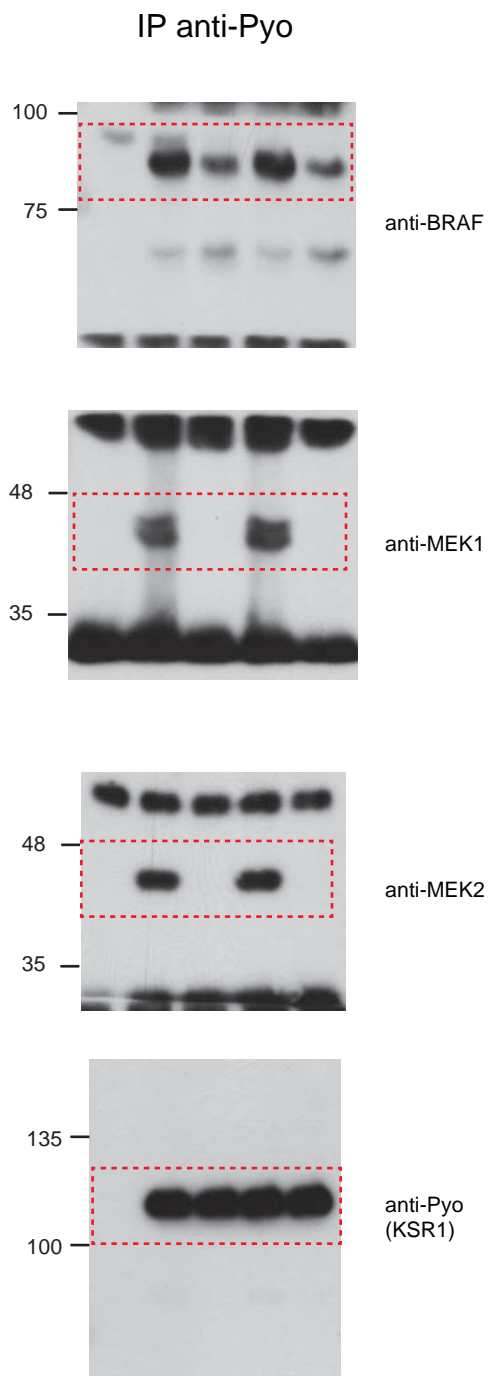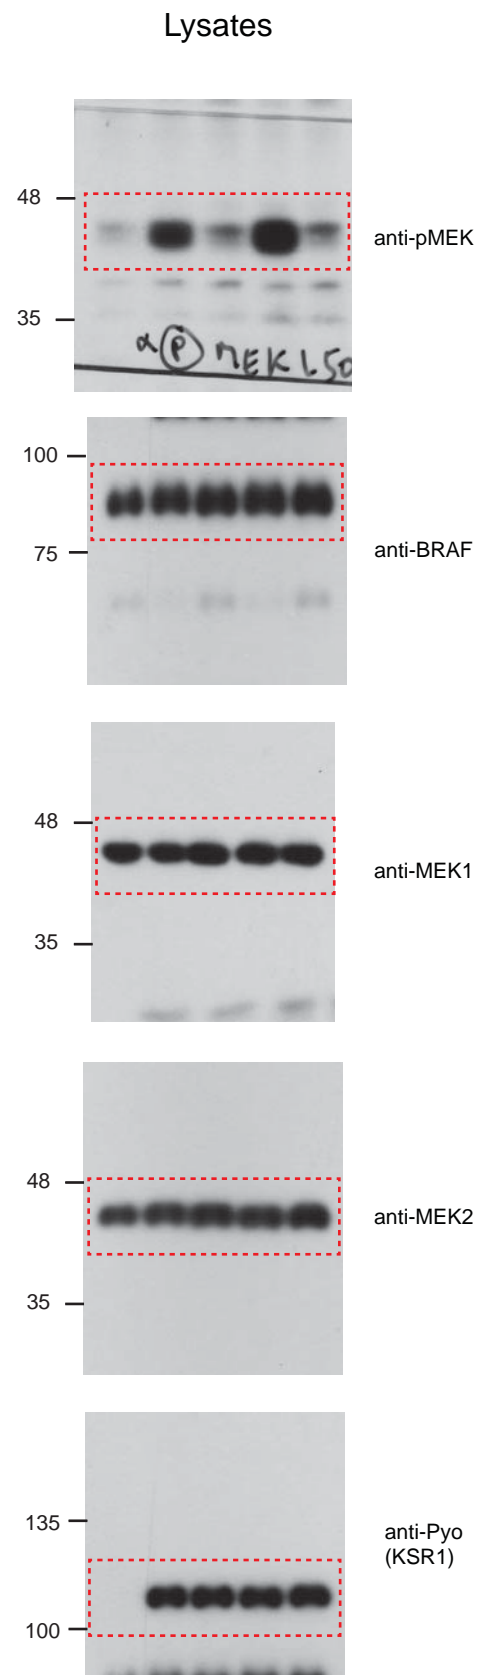

Extended Data Figure 5c  
IP anti-Flag

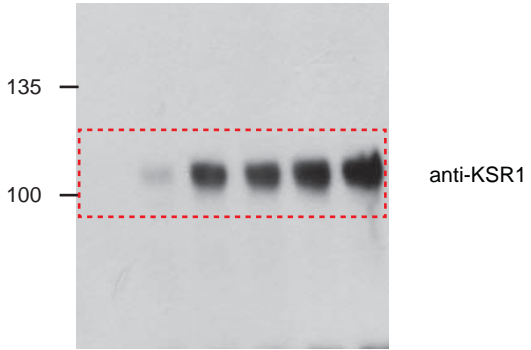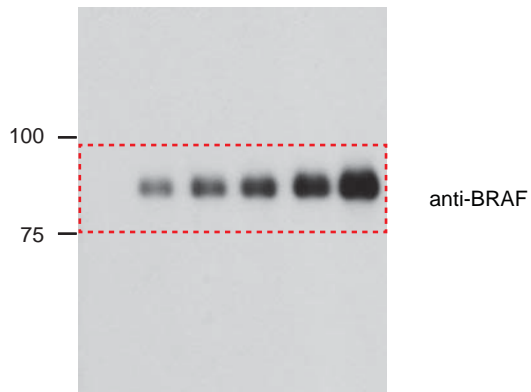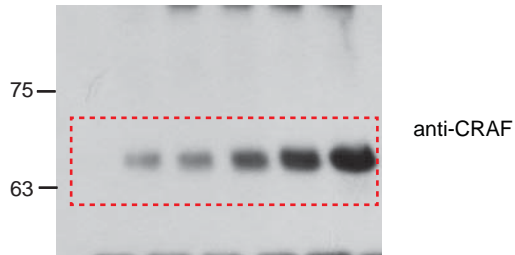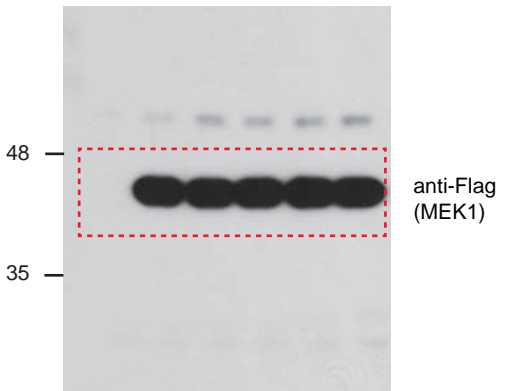

Lysates

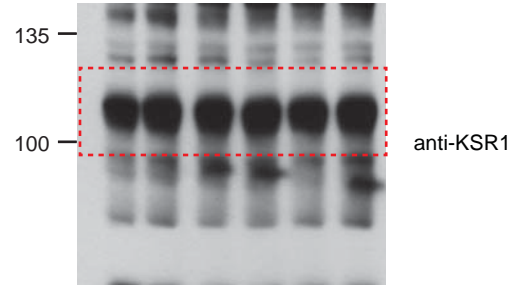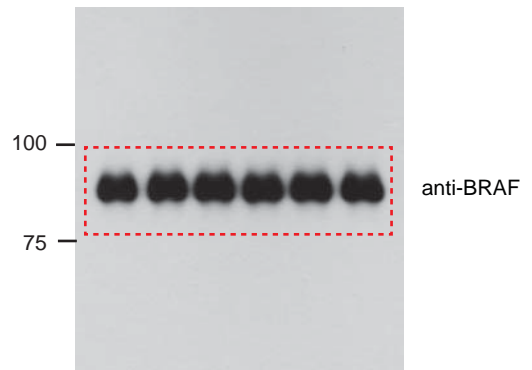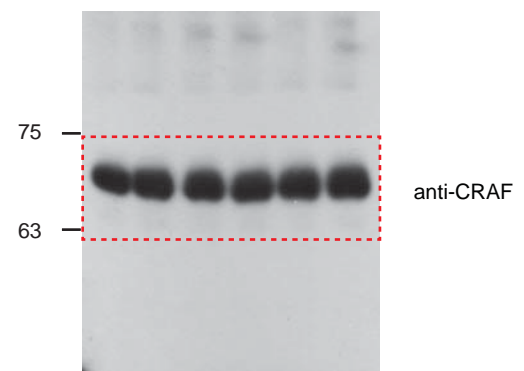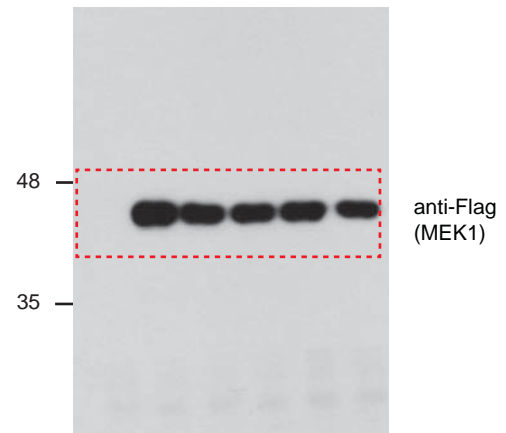

Extended Data Figure 6a

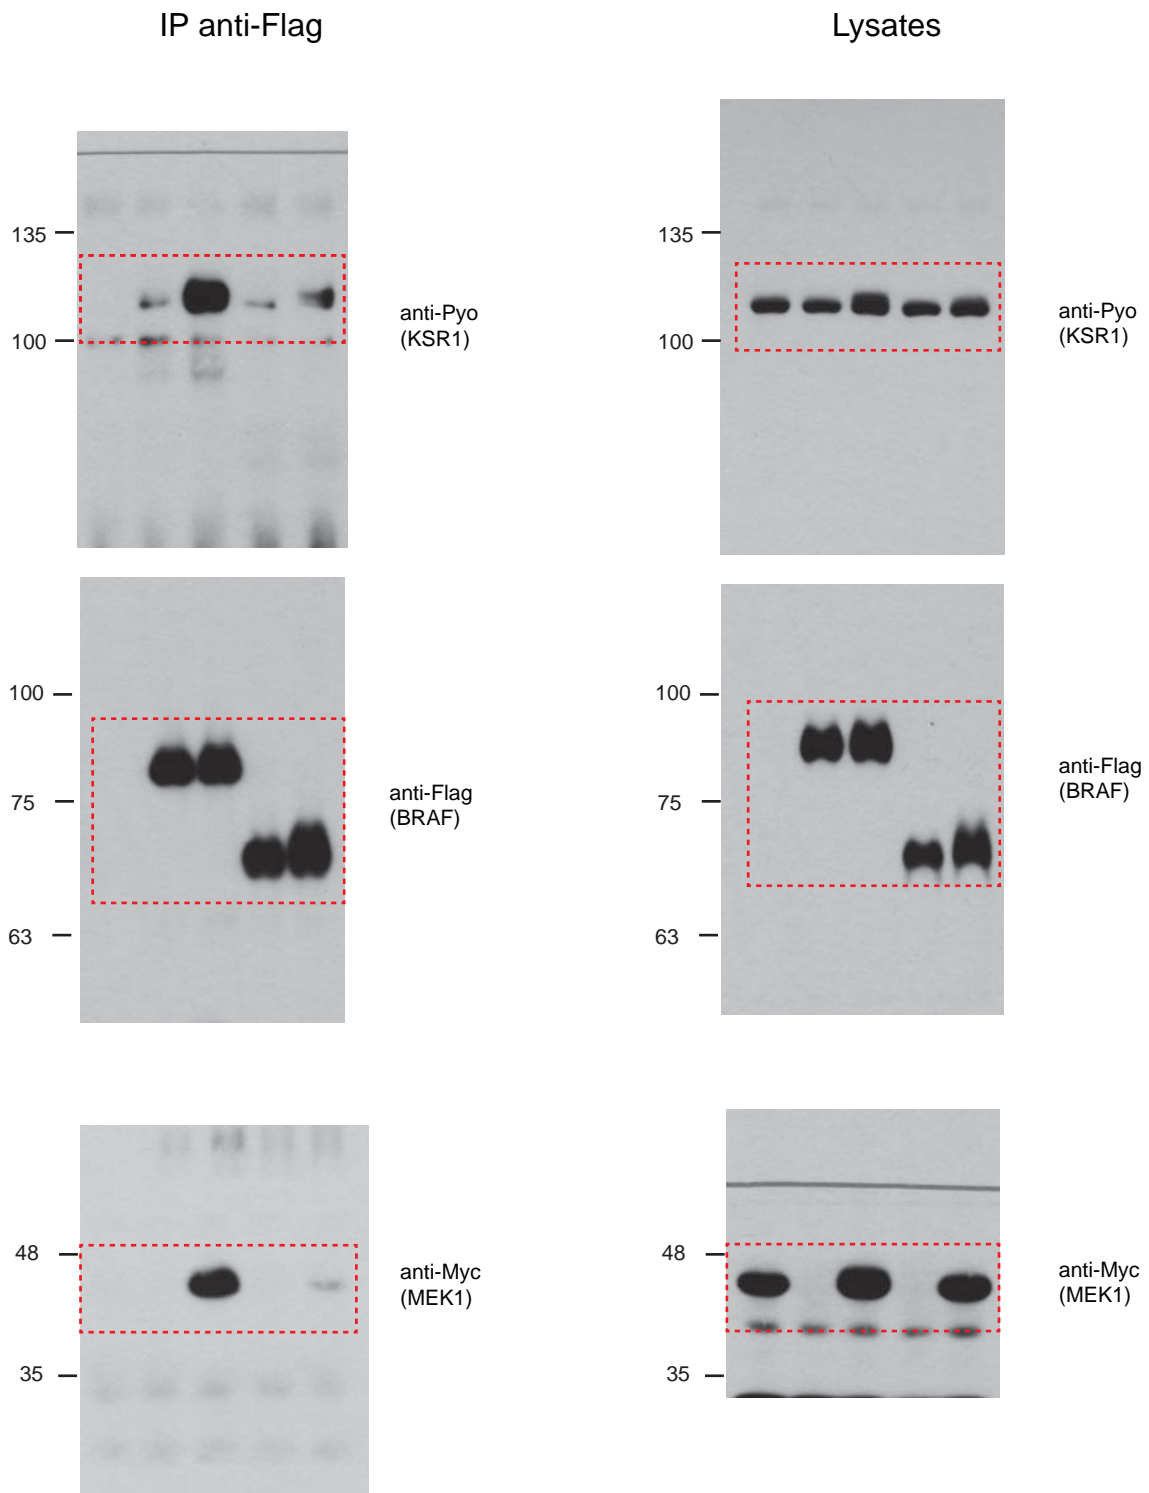

Extended Data Figure 6e

IP anti-Flag

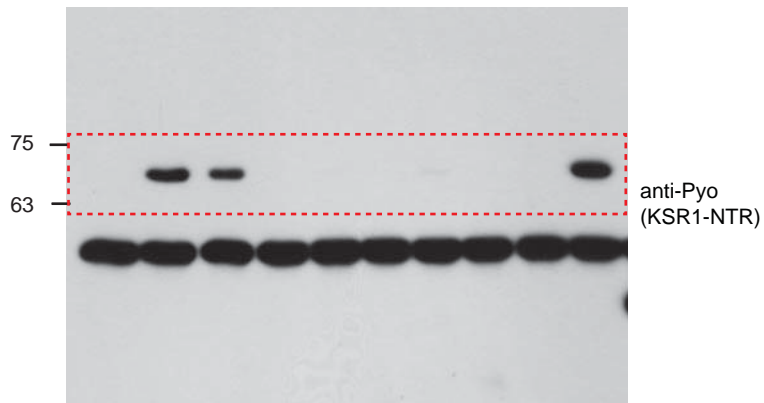

Lysates

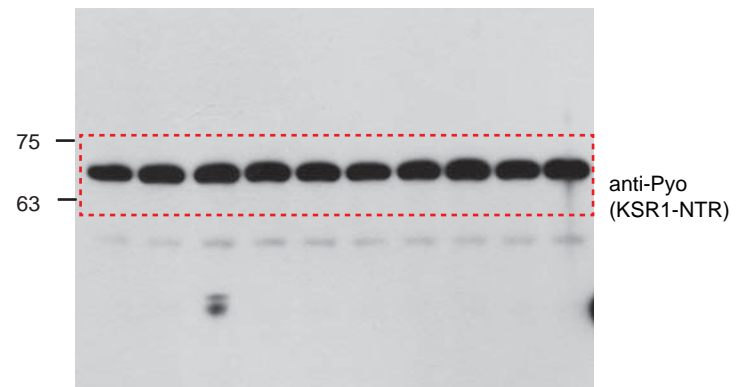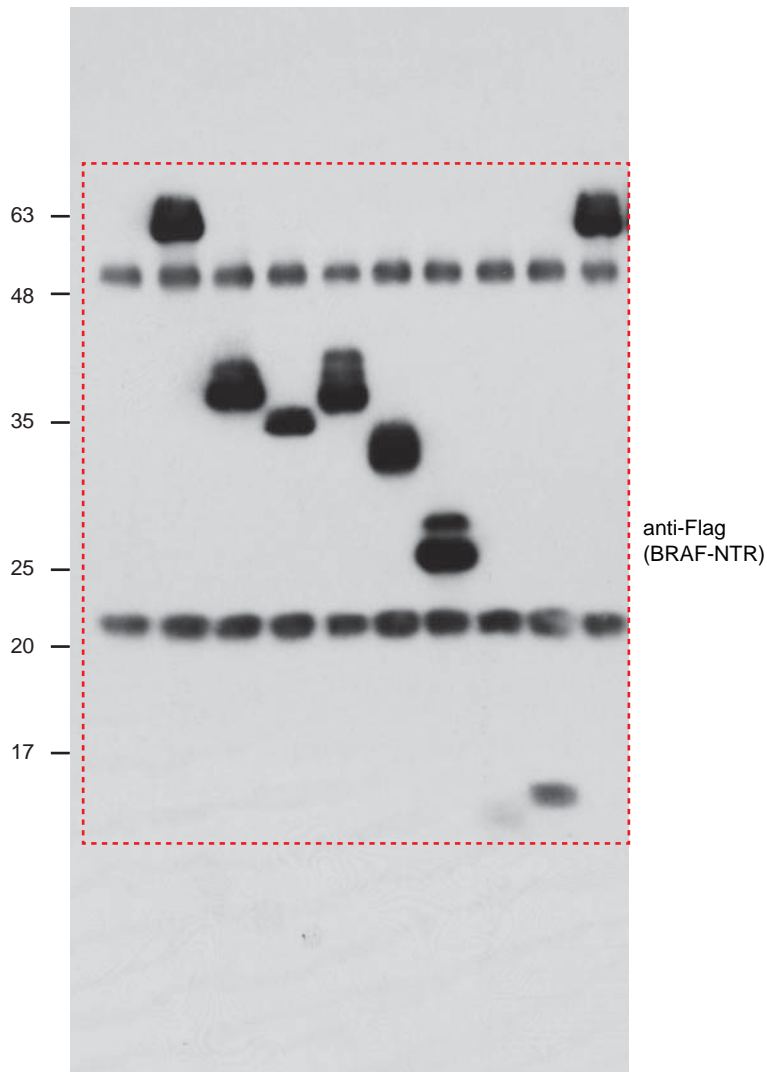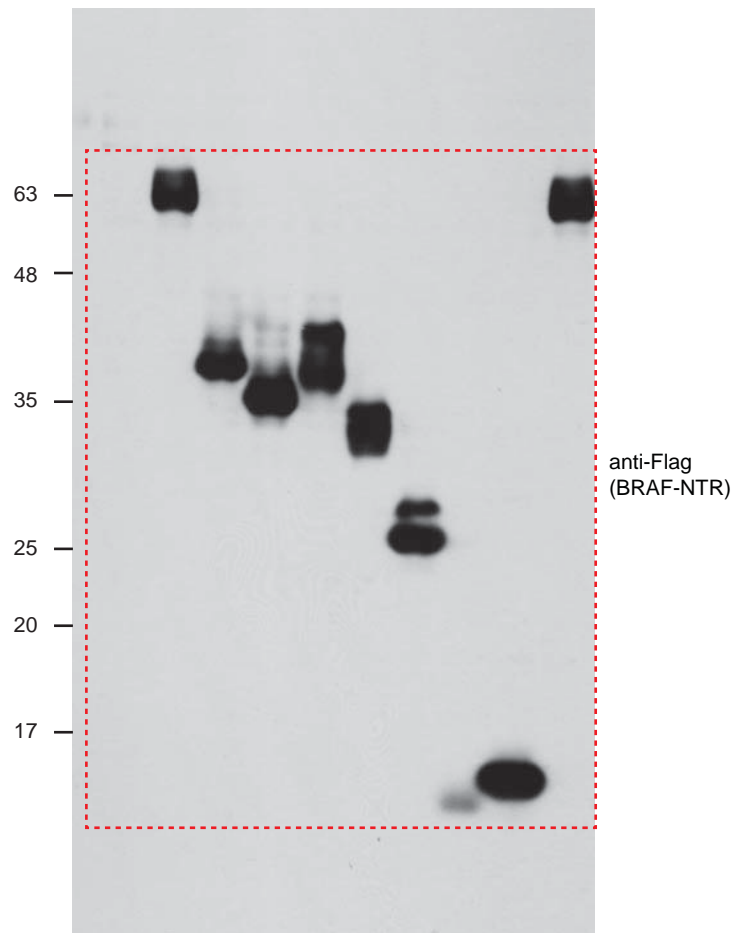

Extended Data Figure 6f

IP anti-Flag

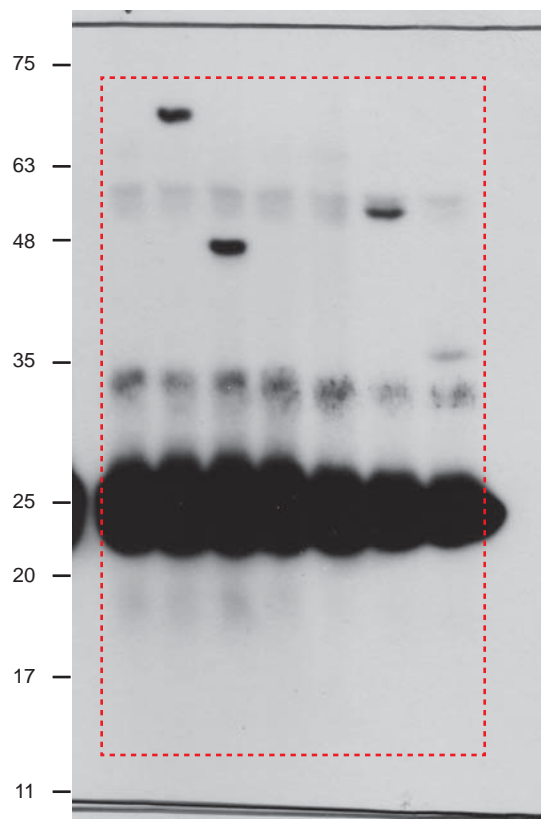

anti-Pyo  
(KSR1-NTR)

Lysates

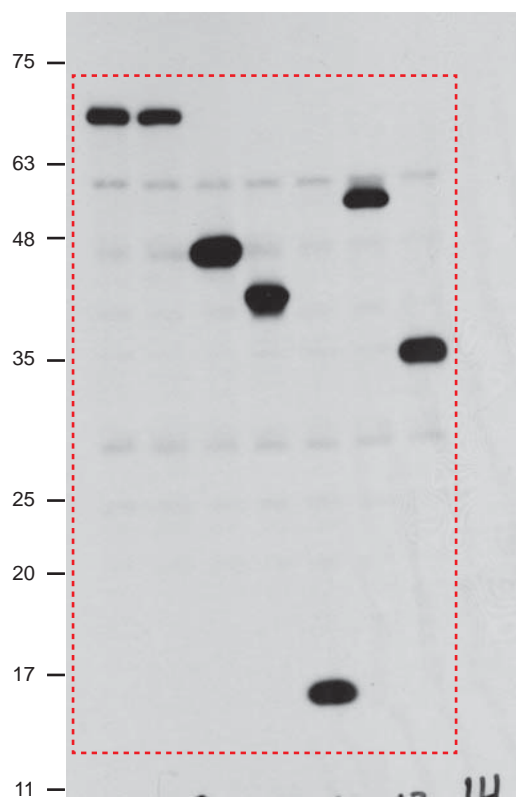

anti-Pyo  
(KSR1-NTR)

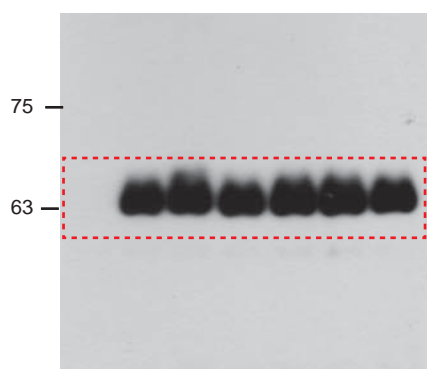

anti-Flag  
(BRAF-NTR)

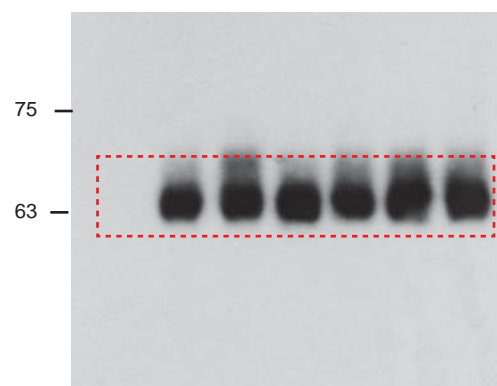

anti-Flag  
(BRAF-NTR)

Extended Data Figure 7f

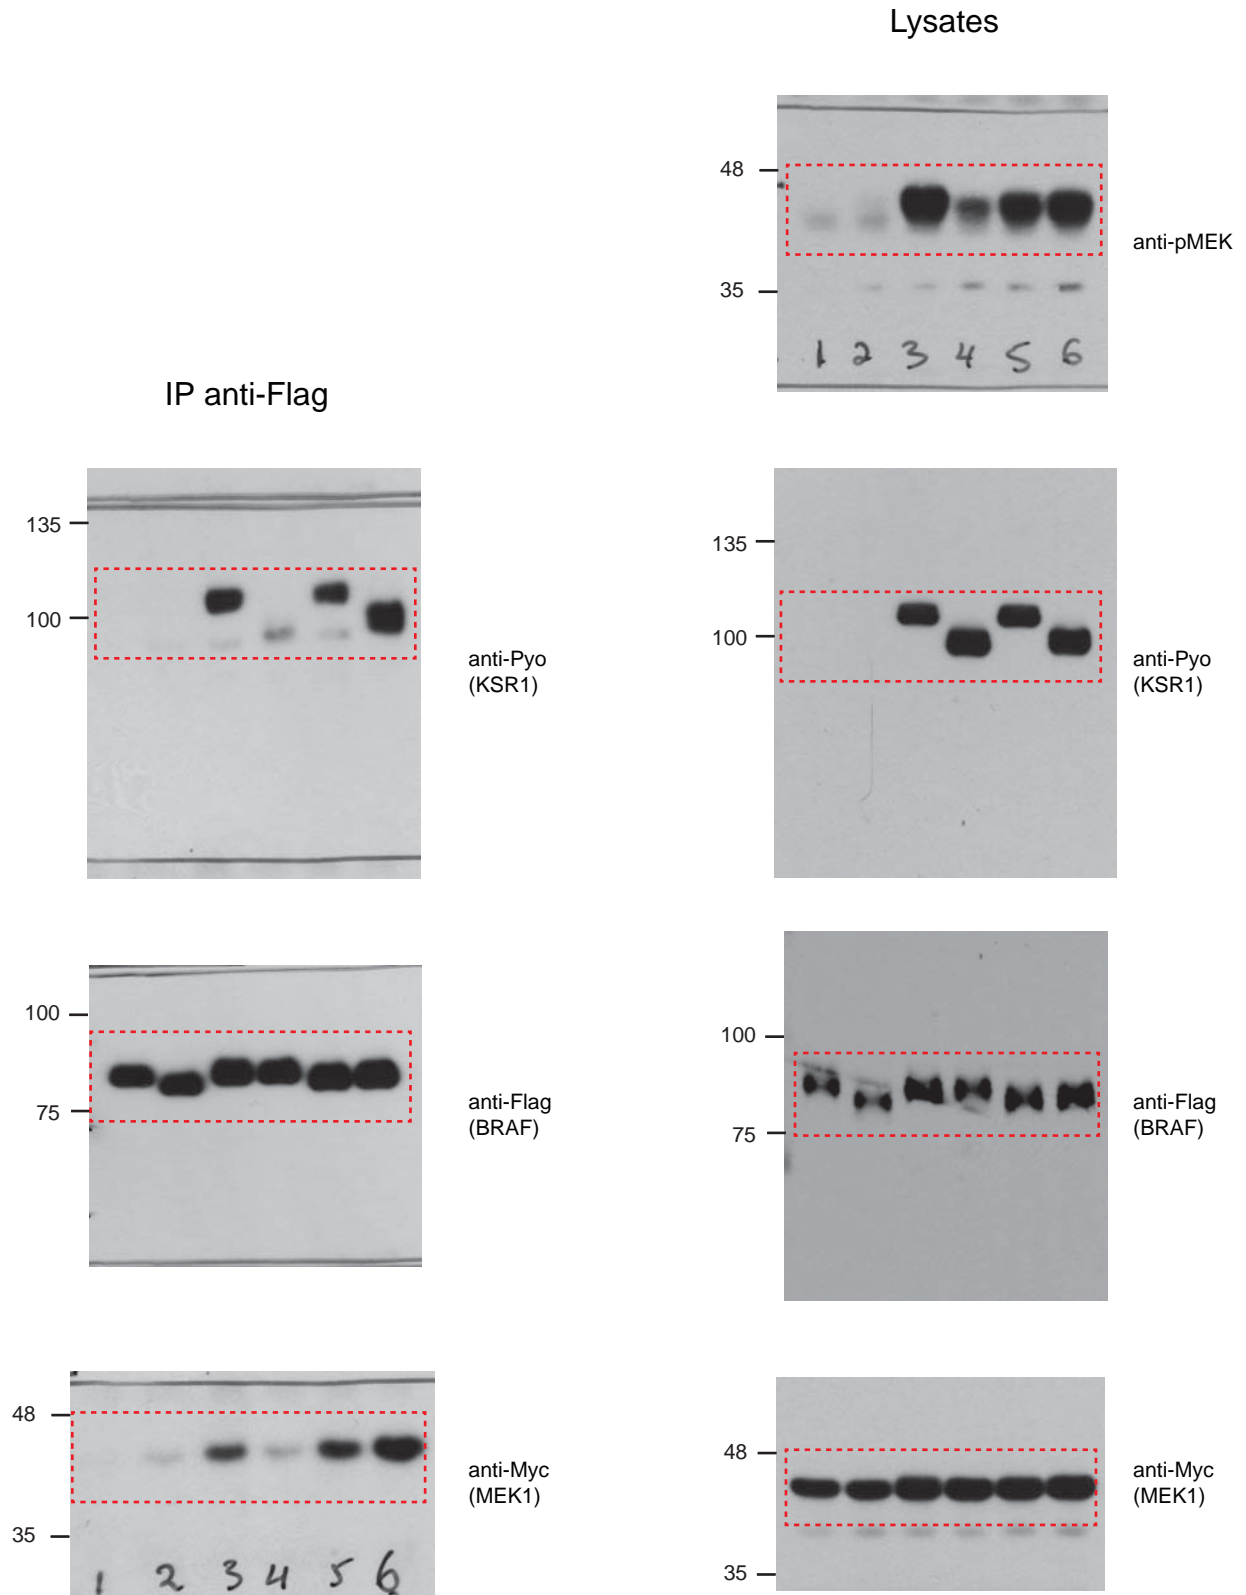

Extended Data Figure 7g

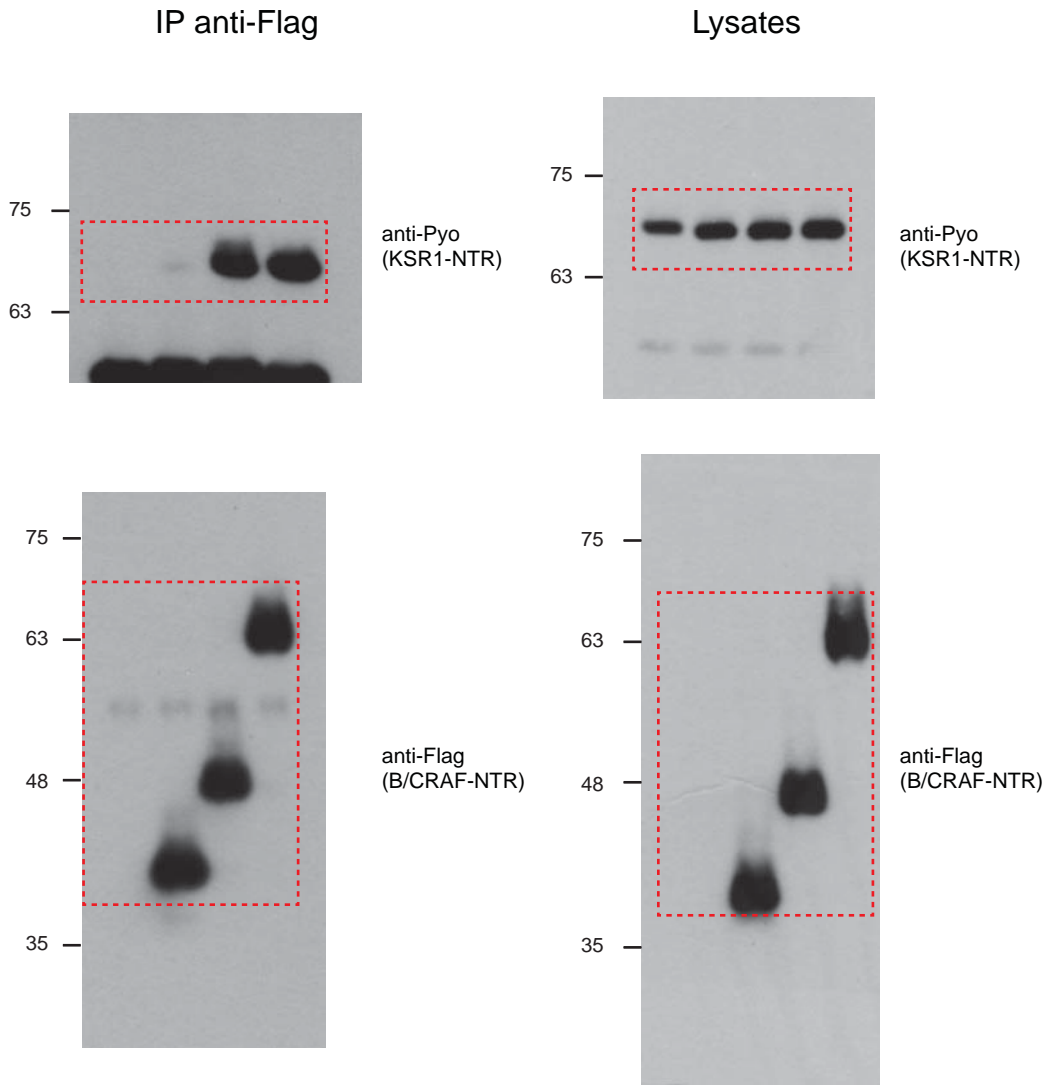

Extended Data Figure 10d

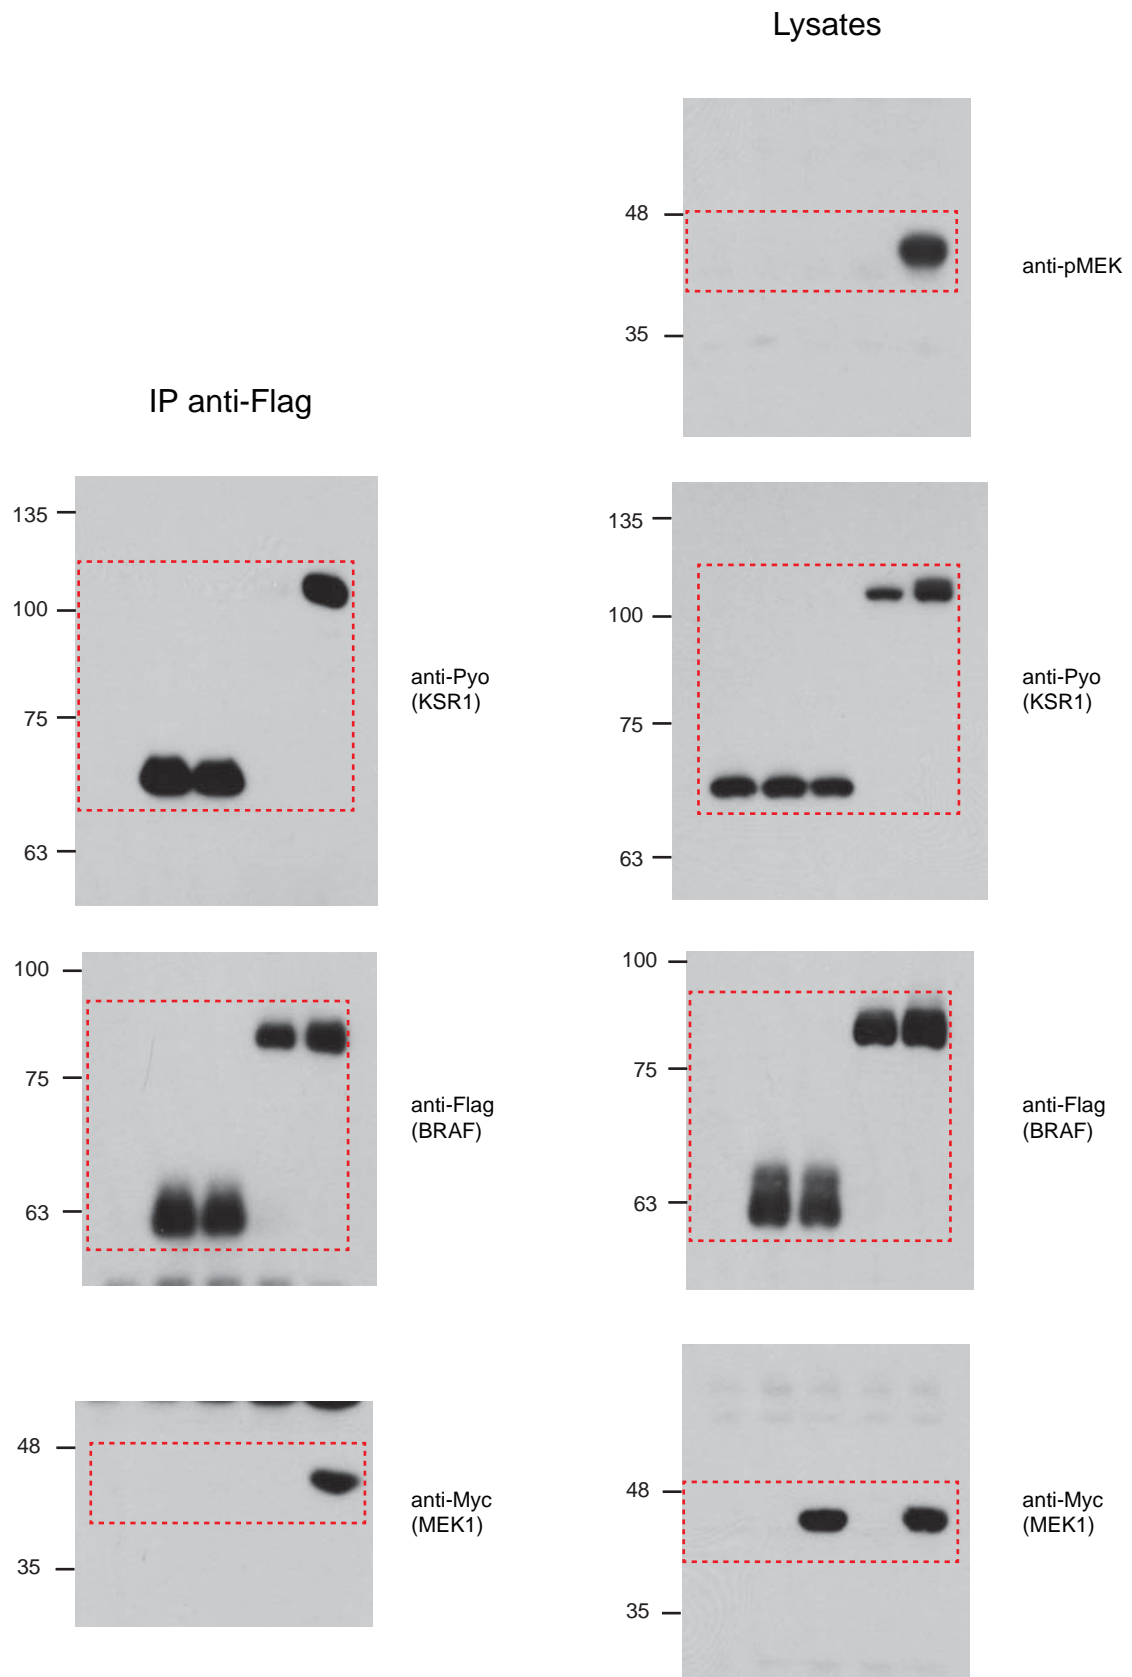



Extended Data Figure 10f

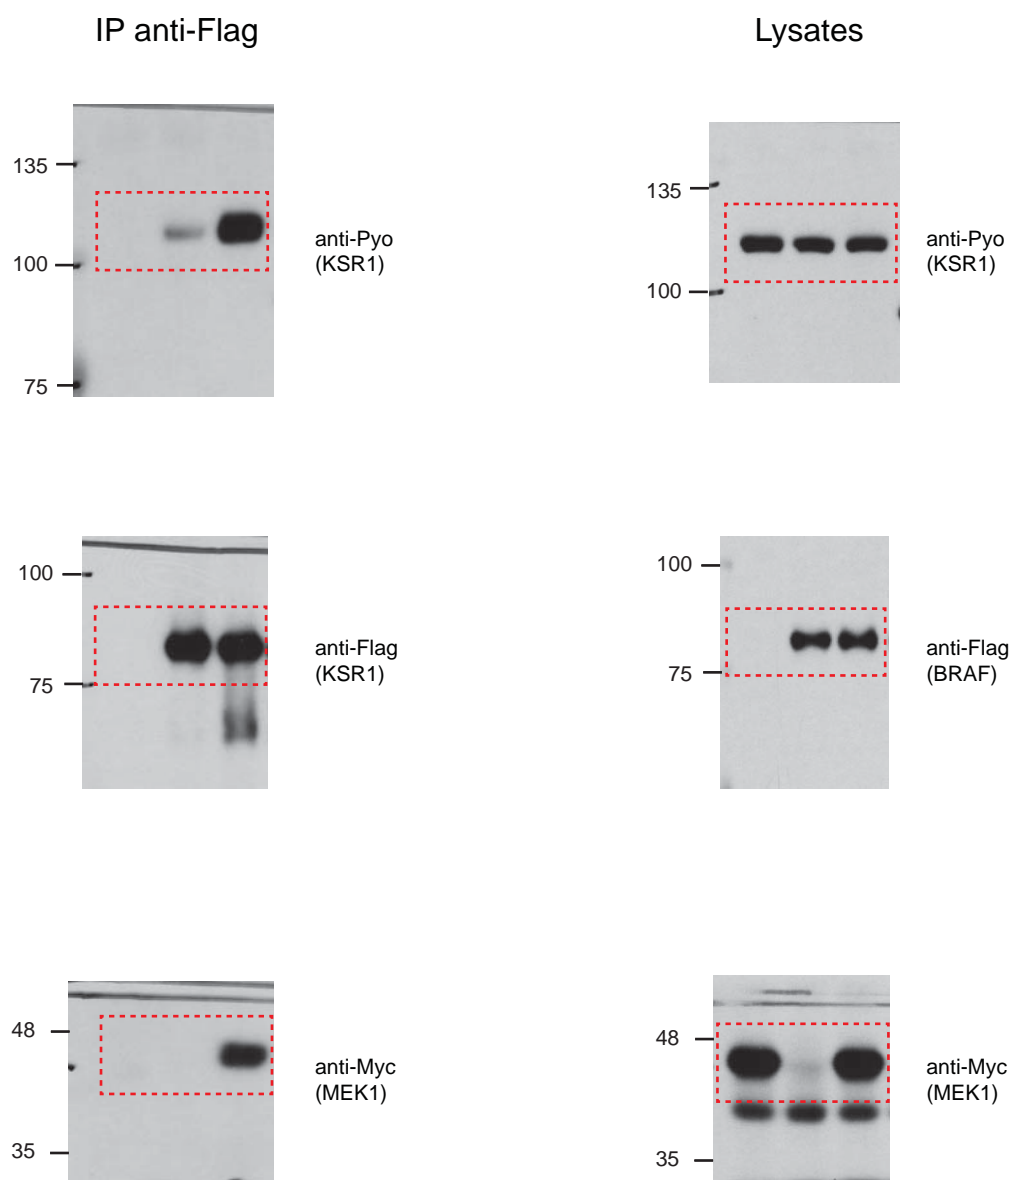

**Supplementary Figure 1. Gel source data for immunoblots presented in the main and extended data figures including molecular weight markers (kDa).**
